# Supplementary material for: Copper-catalyzed oxidative amination of methanol to access quinazolines
Source: Royal Society of Chemistry journal article supplement (doi:10.1039/c9ob00392d), 2019-01-01

## *Supporting Information*

### **Copper-Catalyzed Oxidative Amination of Methanol to Access Quinazolines**

*Gandhesiri Satish, Polu Ashok, Laxman Kota and Andivelu Ilangovan\**  
*School of Chemistry, Bharathidasan University, Tiruchirappalli – 620 024, India.*  
*Email: ilangovanbdu@yahoo.com*

|          |                                                                                     |             |
|----------|-------------------------------------------------------------------------------------|-------------|
| <b>1</b> | <b>Copies of <math>^1\text{H}</math> and <math>^{13}\text{C}</math> NMR spectra</b> | <b>2-50</b> |
|----------|-------------------------------------------------------------------------------------|-------------|

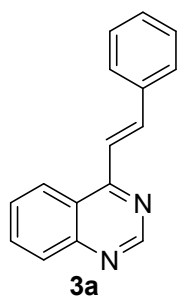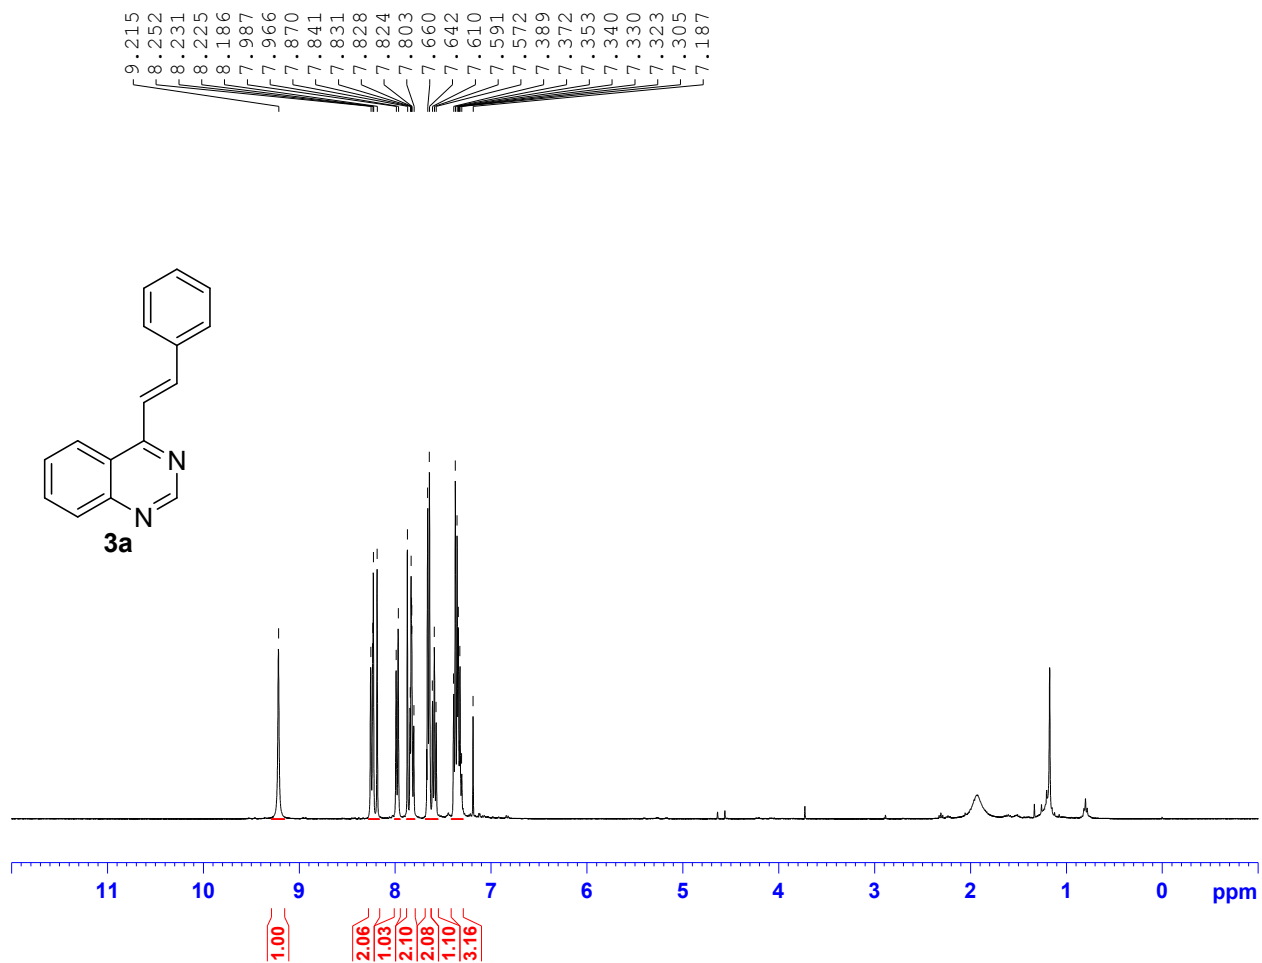

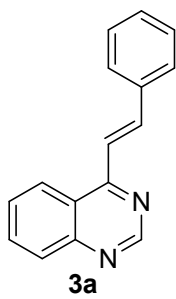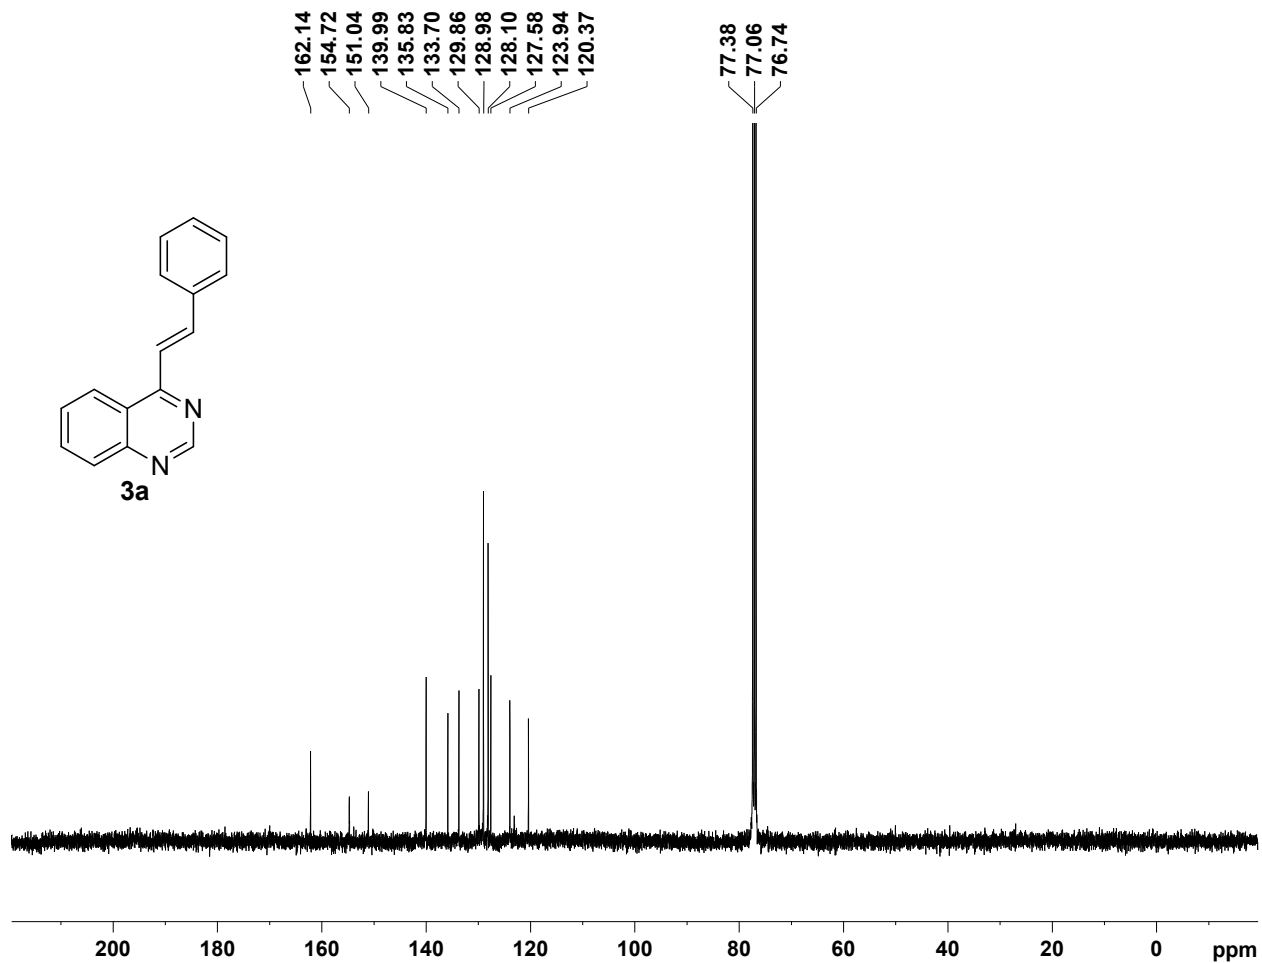

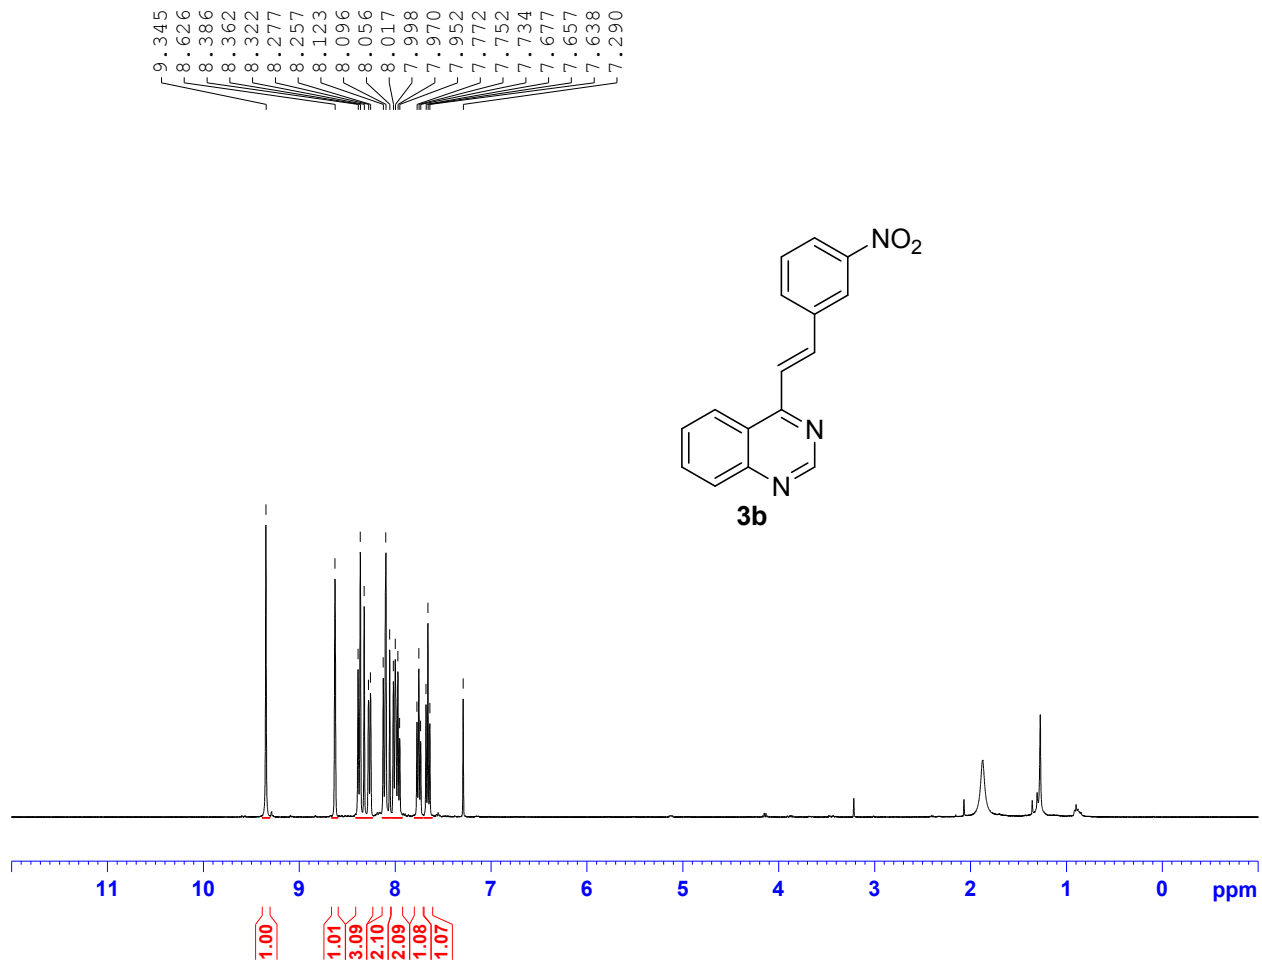

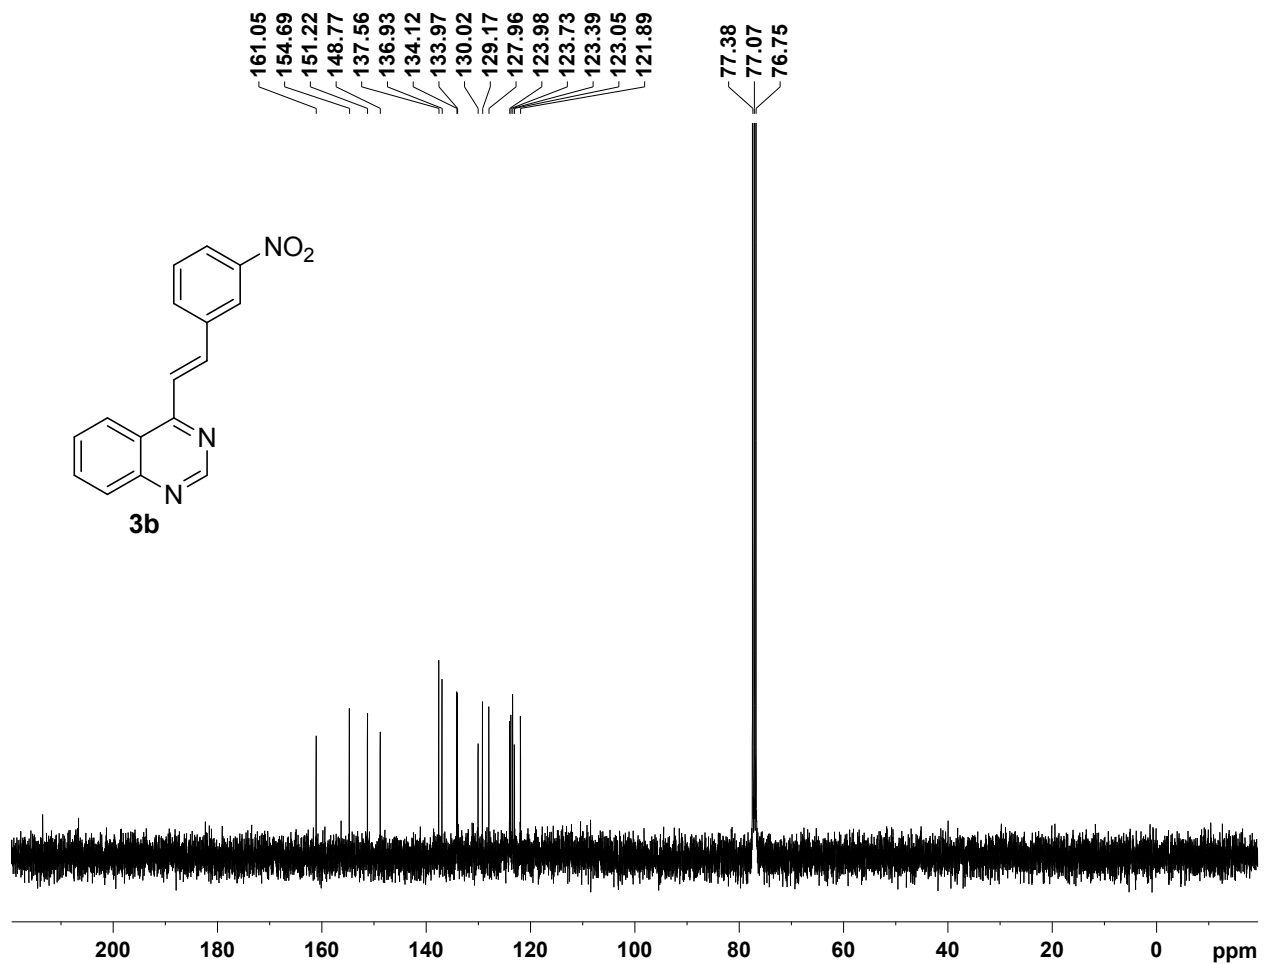

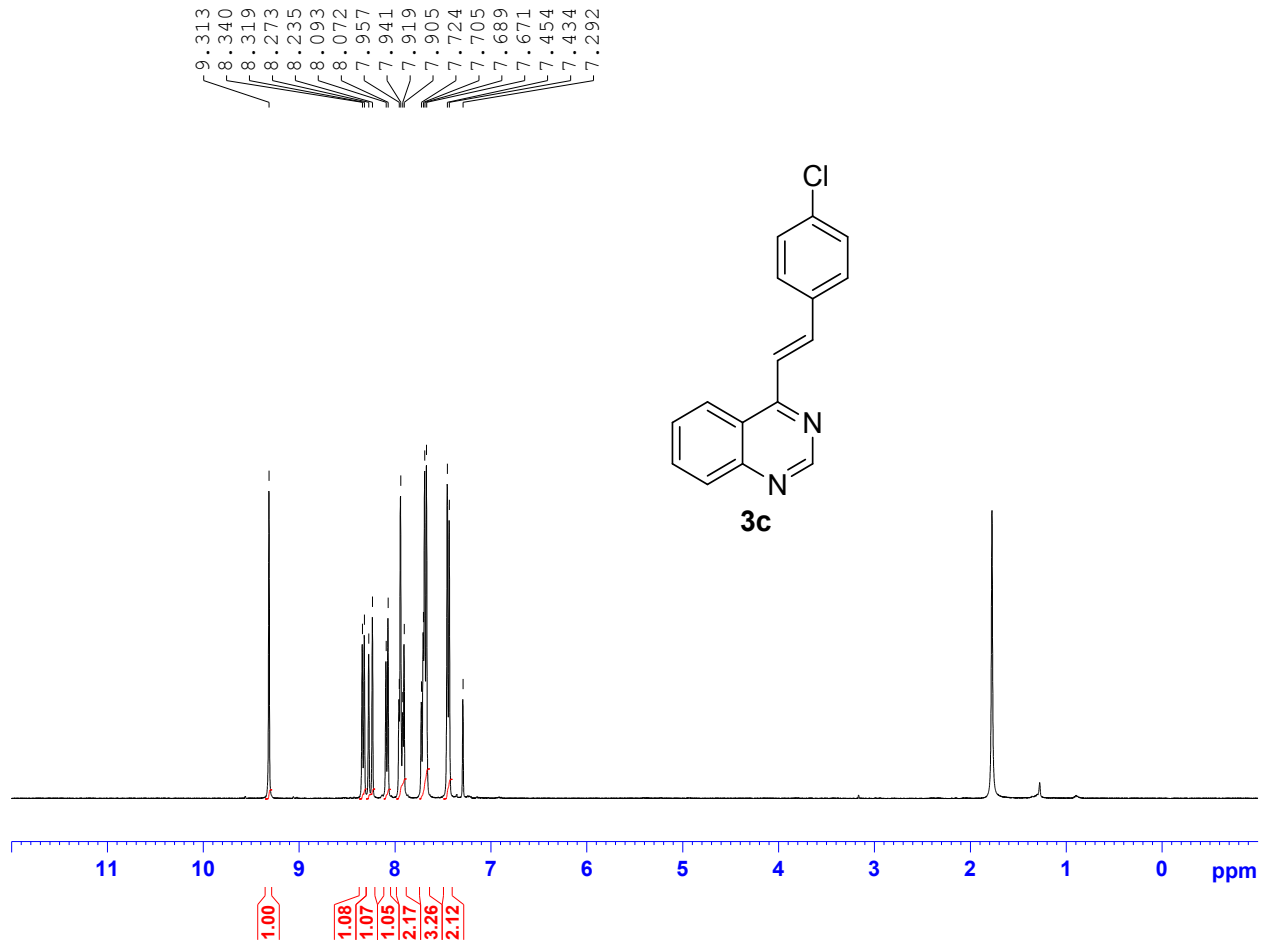

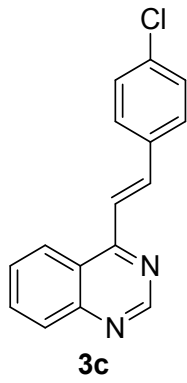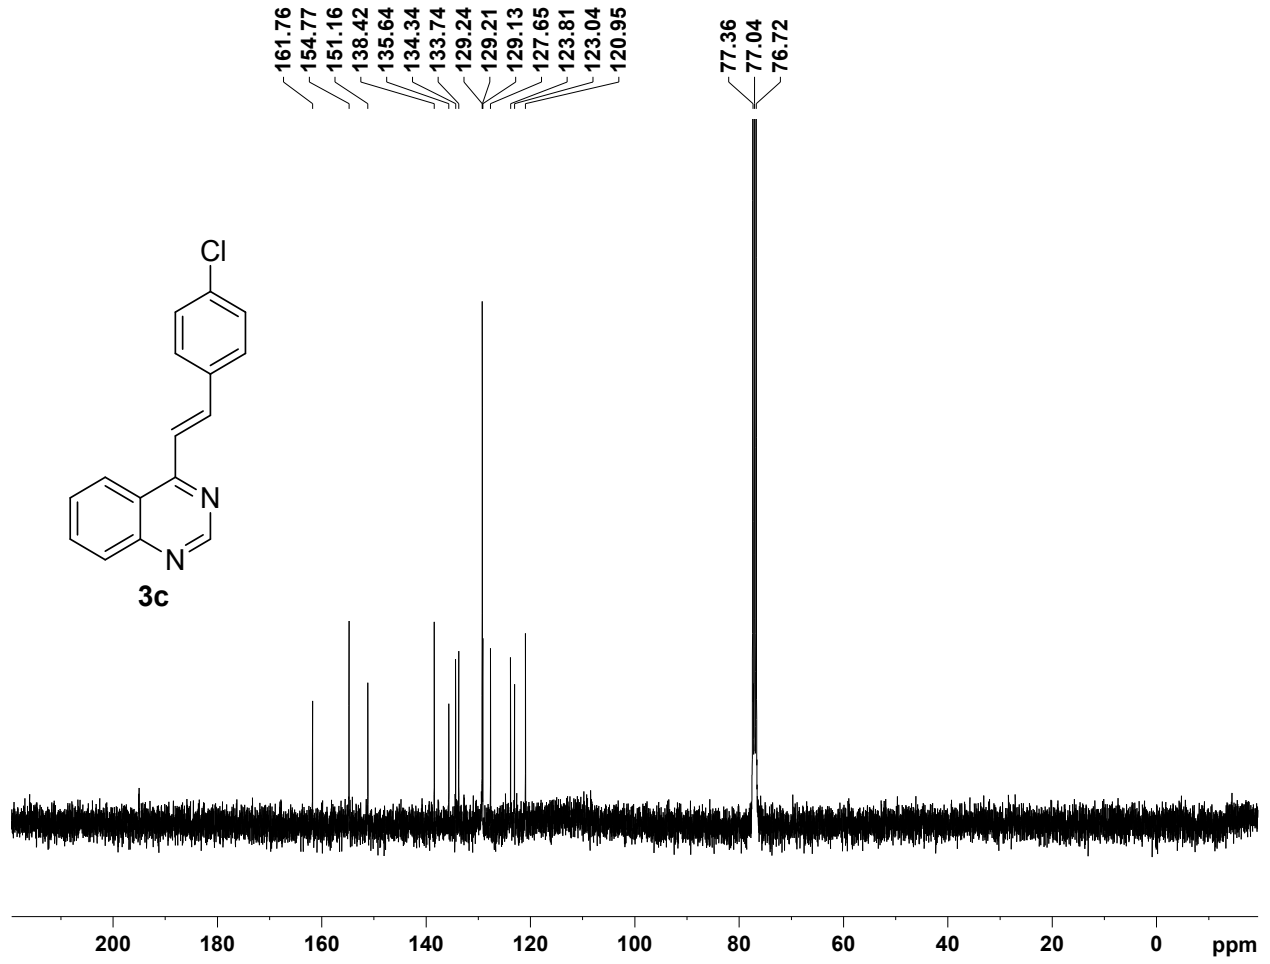

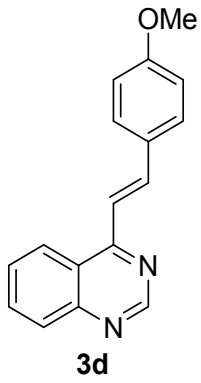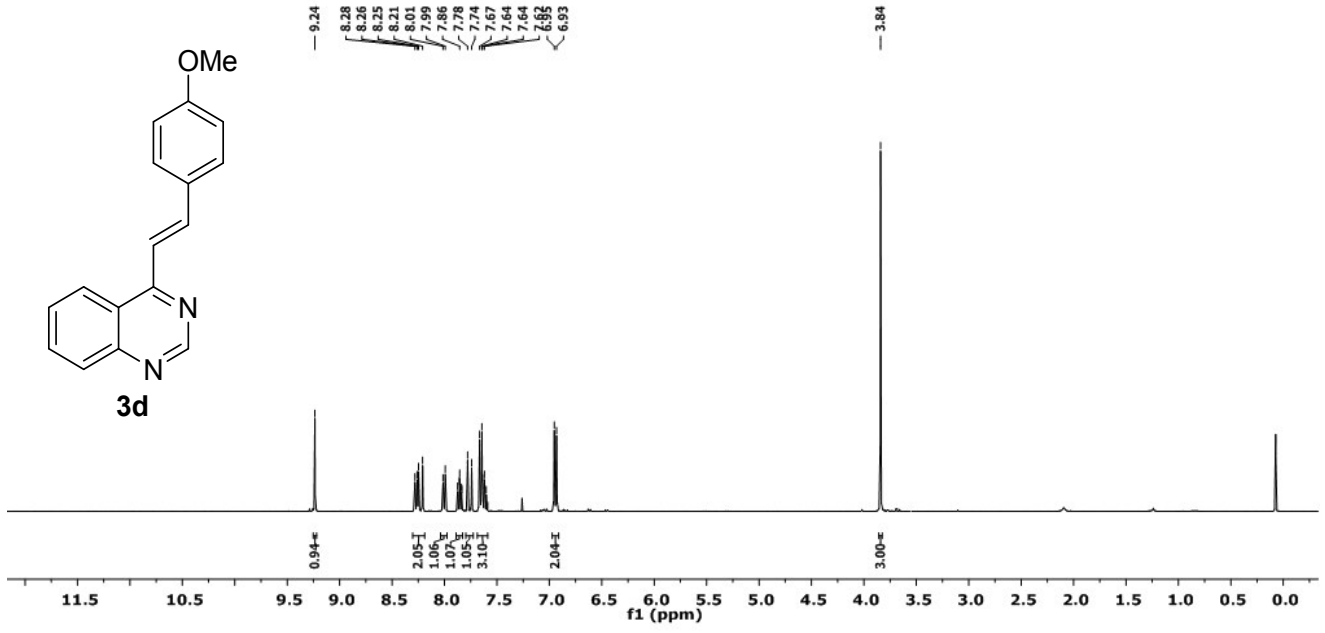



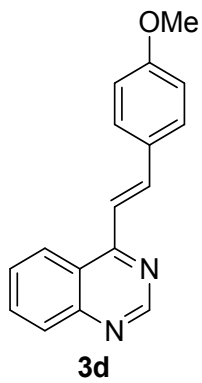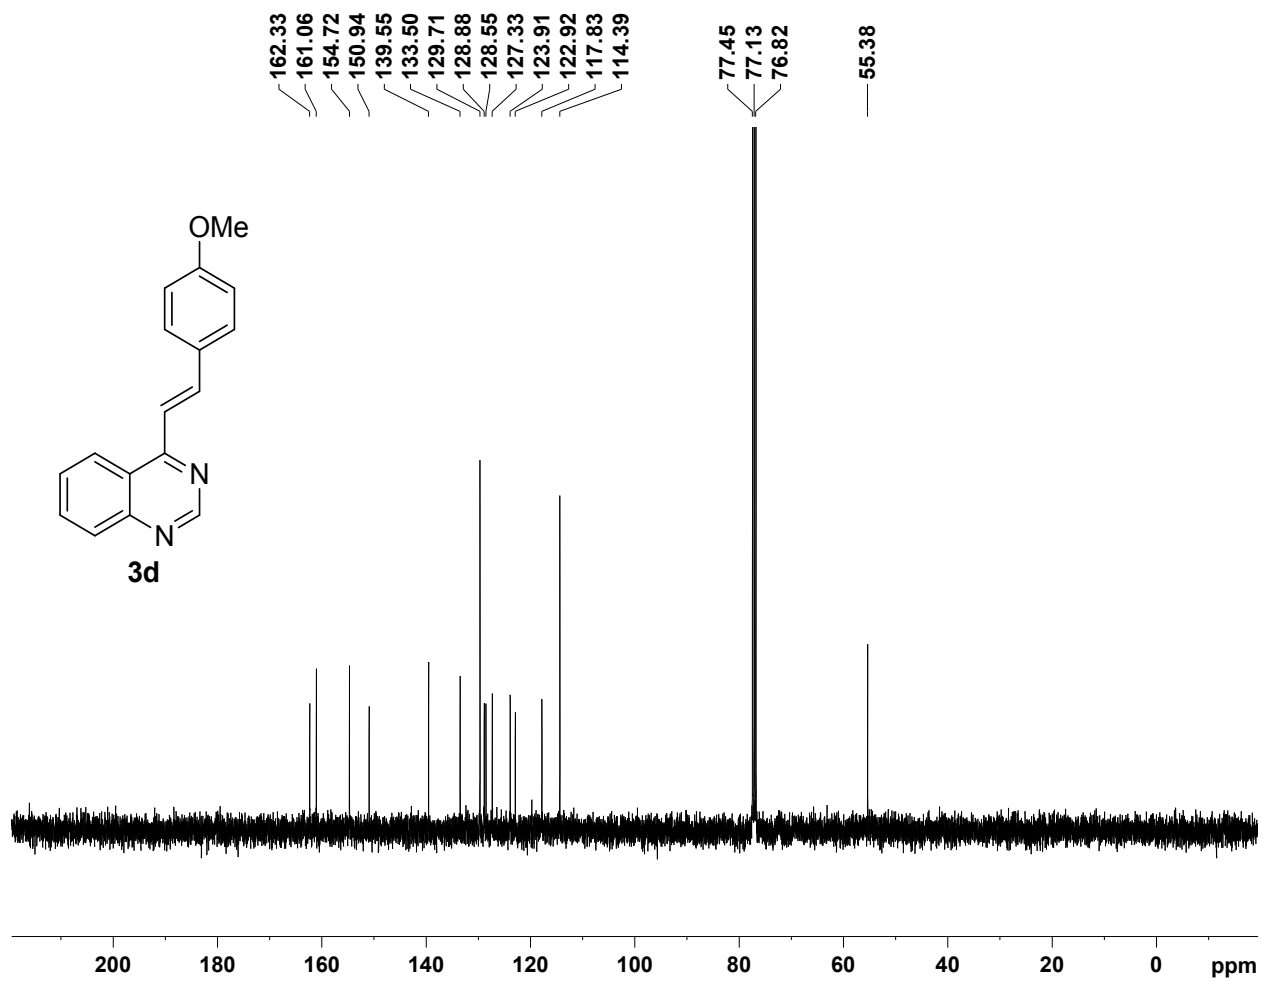

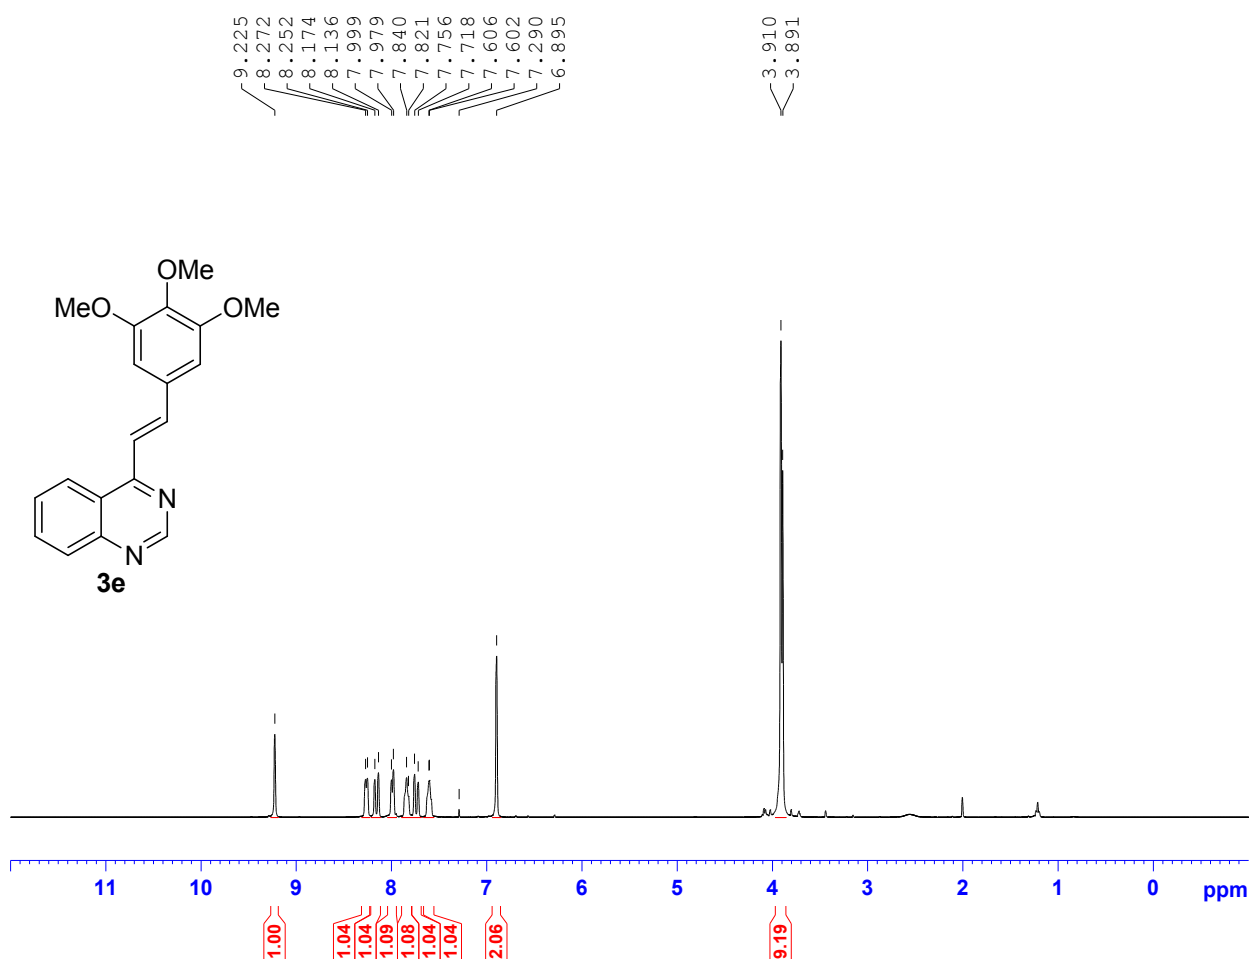

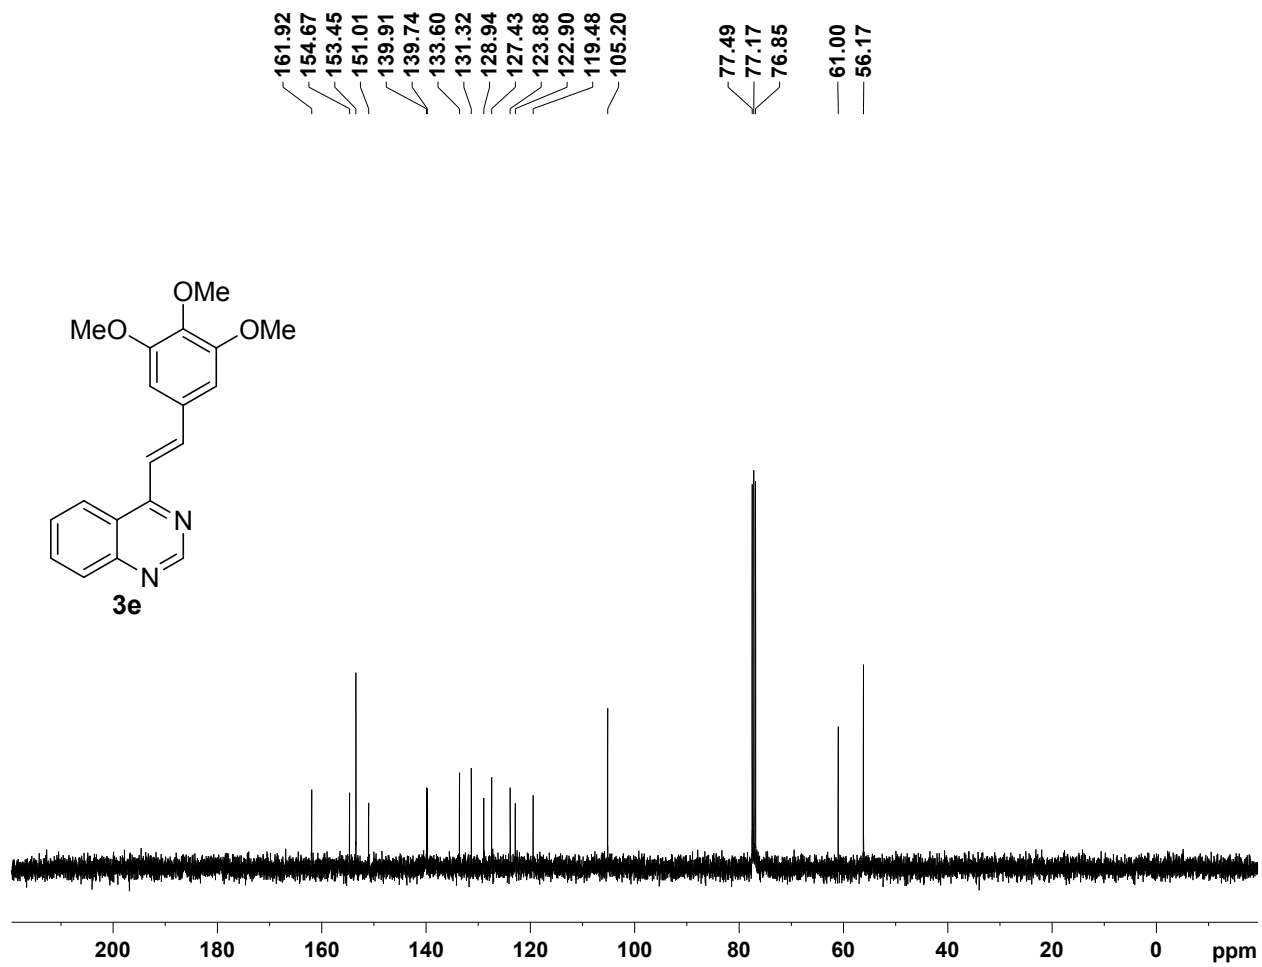

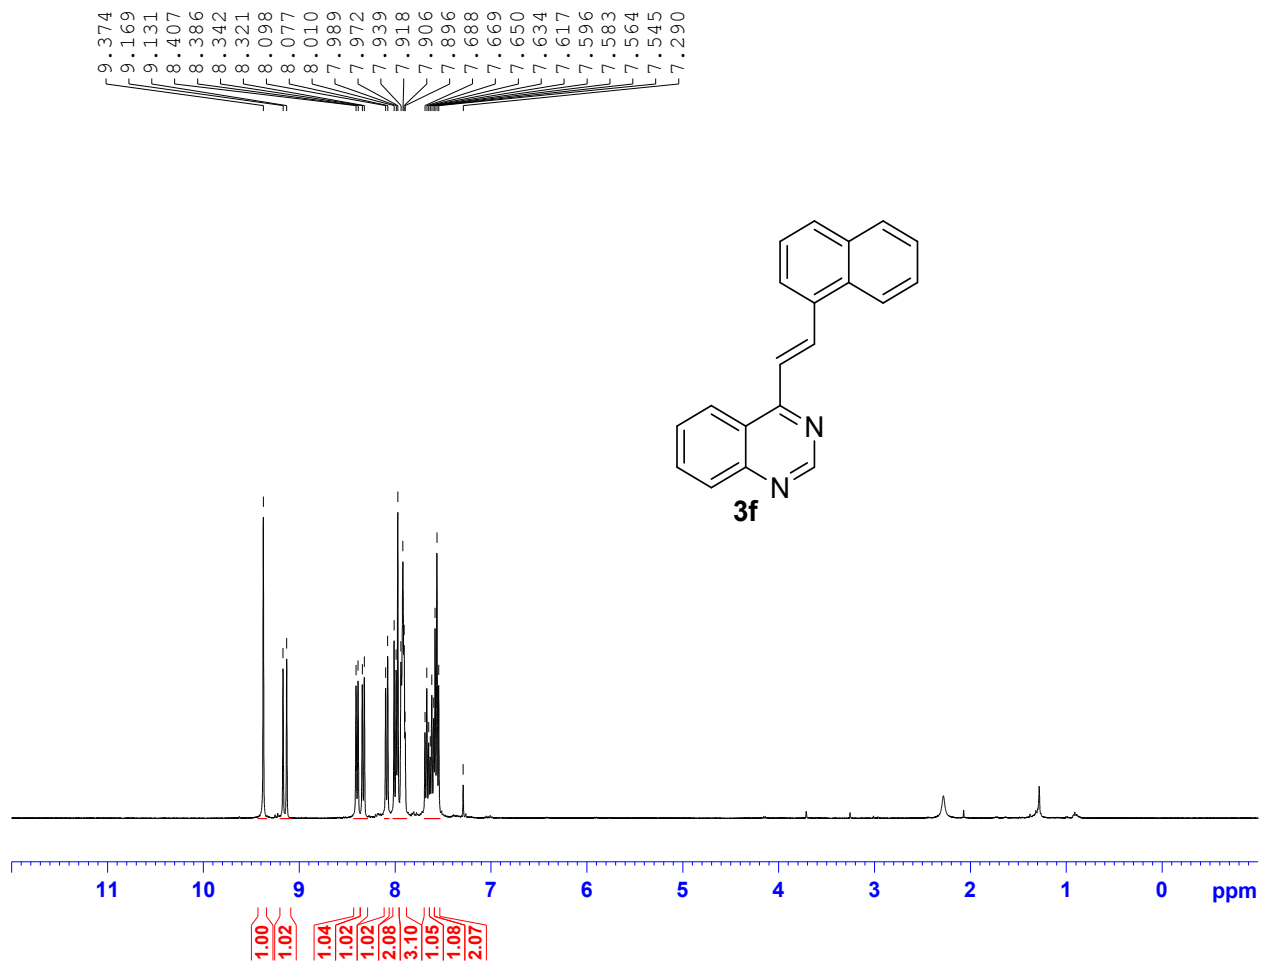

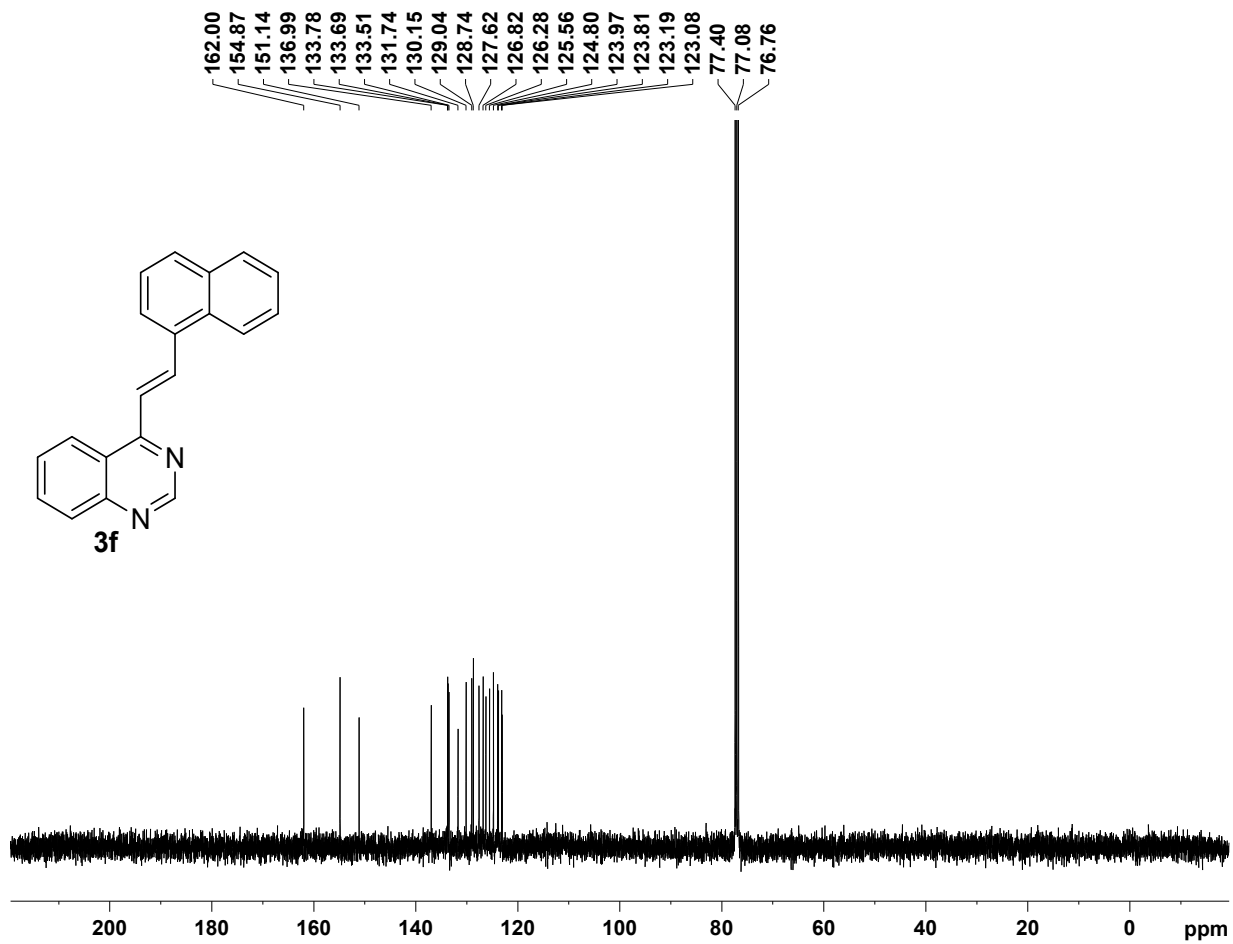

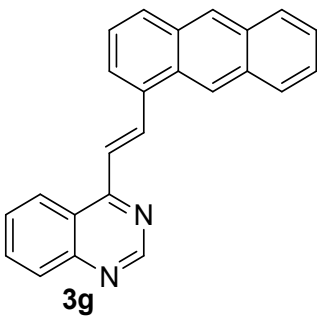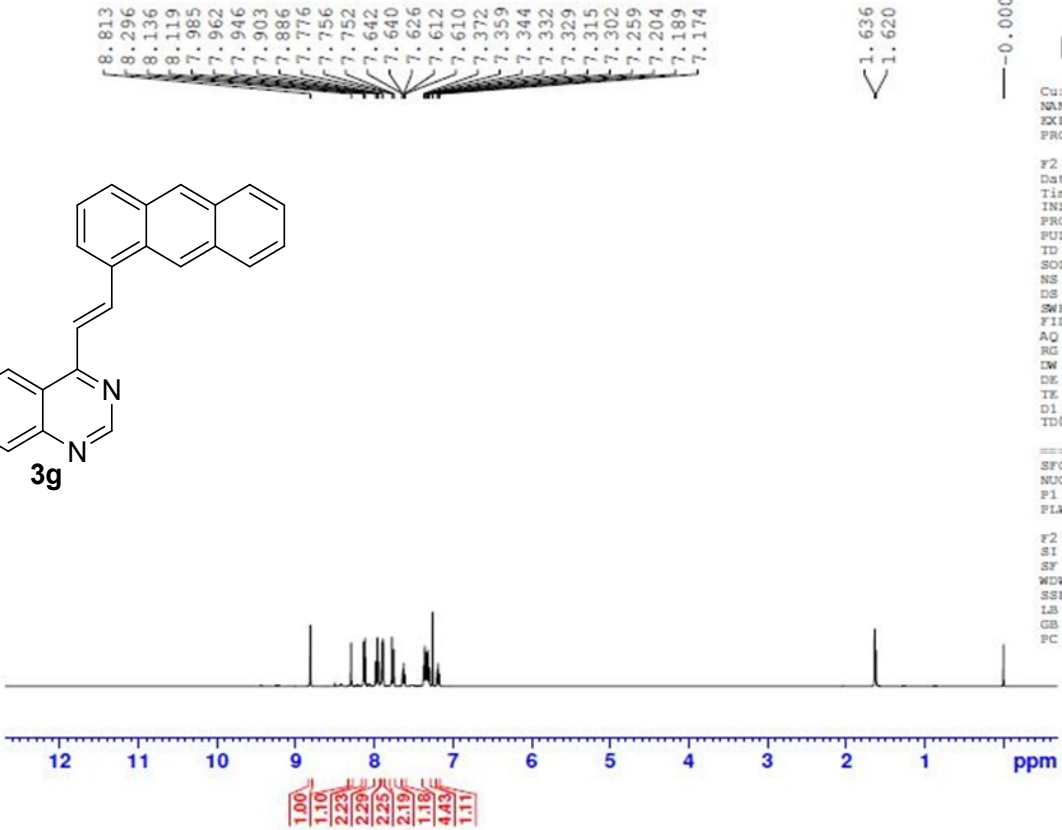

**BRUKER**

Cu: 0  
NAME 1  
EXPNO 1  
PROCNO 1

F2 - Acquisition Parameters  
Data\_ 20190316  
Time 11.45  
INSTRUM spect  
PROBHD 5 mm FAPBO BB/  
PULPROG zg30  
TD 65536  
SOLVENT CDC13  
NS 16  
DS 2  
SWH 10000.000 Hz  
FIDRES 0.152588 Hz  
AQ 3.2767999 sec  
RG 124.78  
LW 50.000 usec  
DE 6.50 usec  
TE 295.8 K  
D1 1.00000000 sec  
TD0 1

==== CHANNEL f1 =====  
SFO1 500.2330891 MHz  
NUC1 1H  
P1 9.85 usec  
PLW1 24.00000000 W

F2 - Processing parameters  
SI 65536  
SF 500.2300136 MHz  
WDW EM  
SSB 0  
LB 0.30 Hz  
GB 0  
PC 1.00

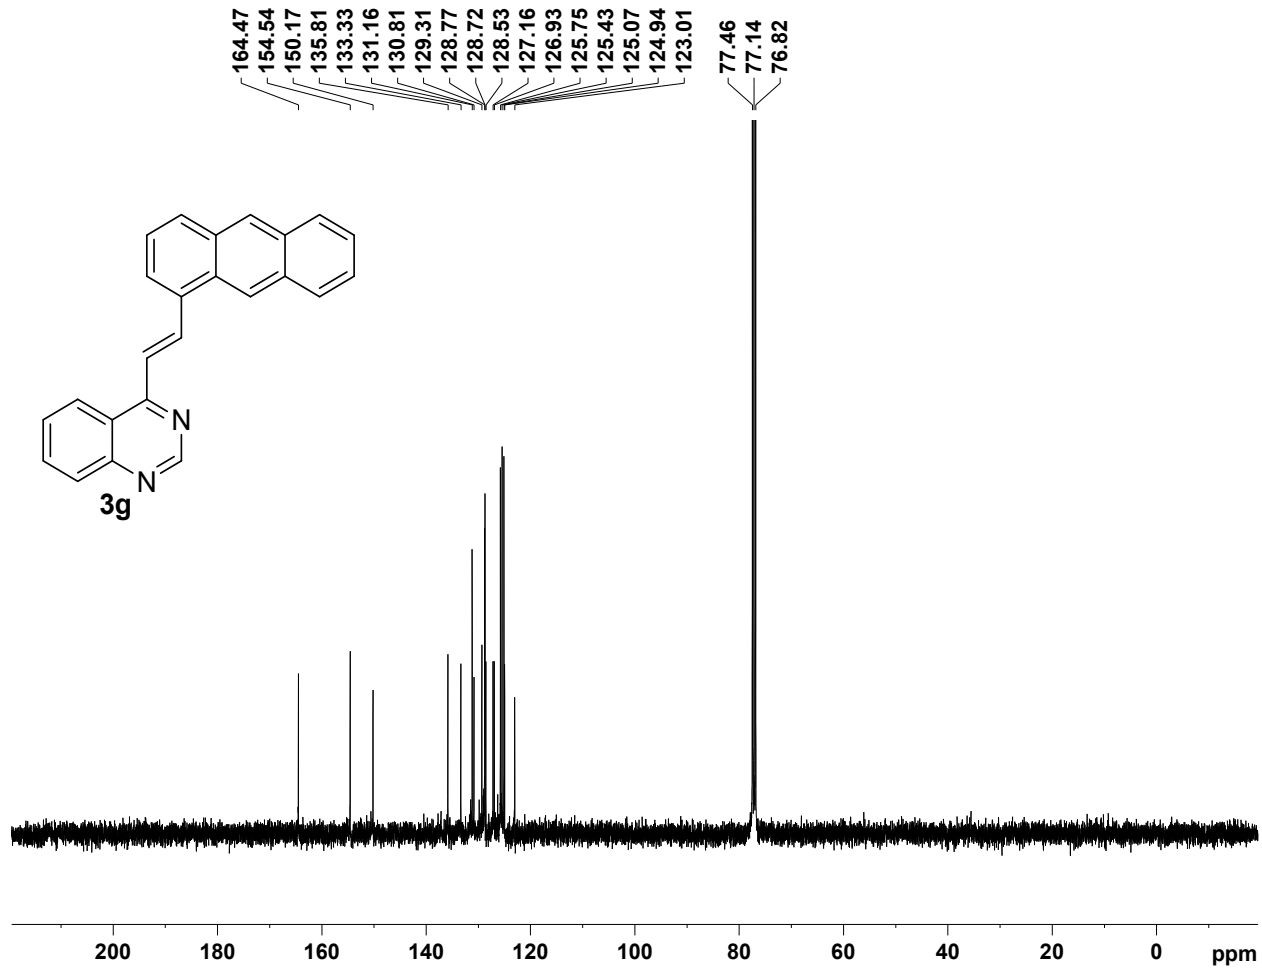

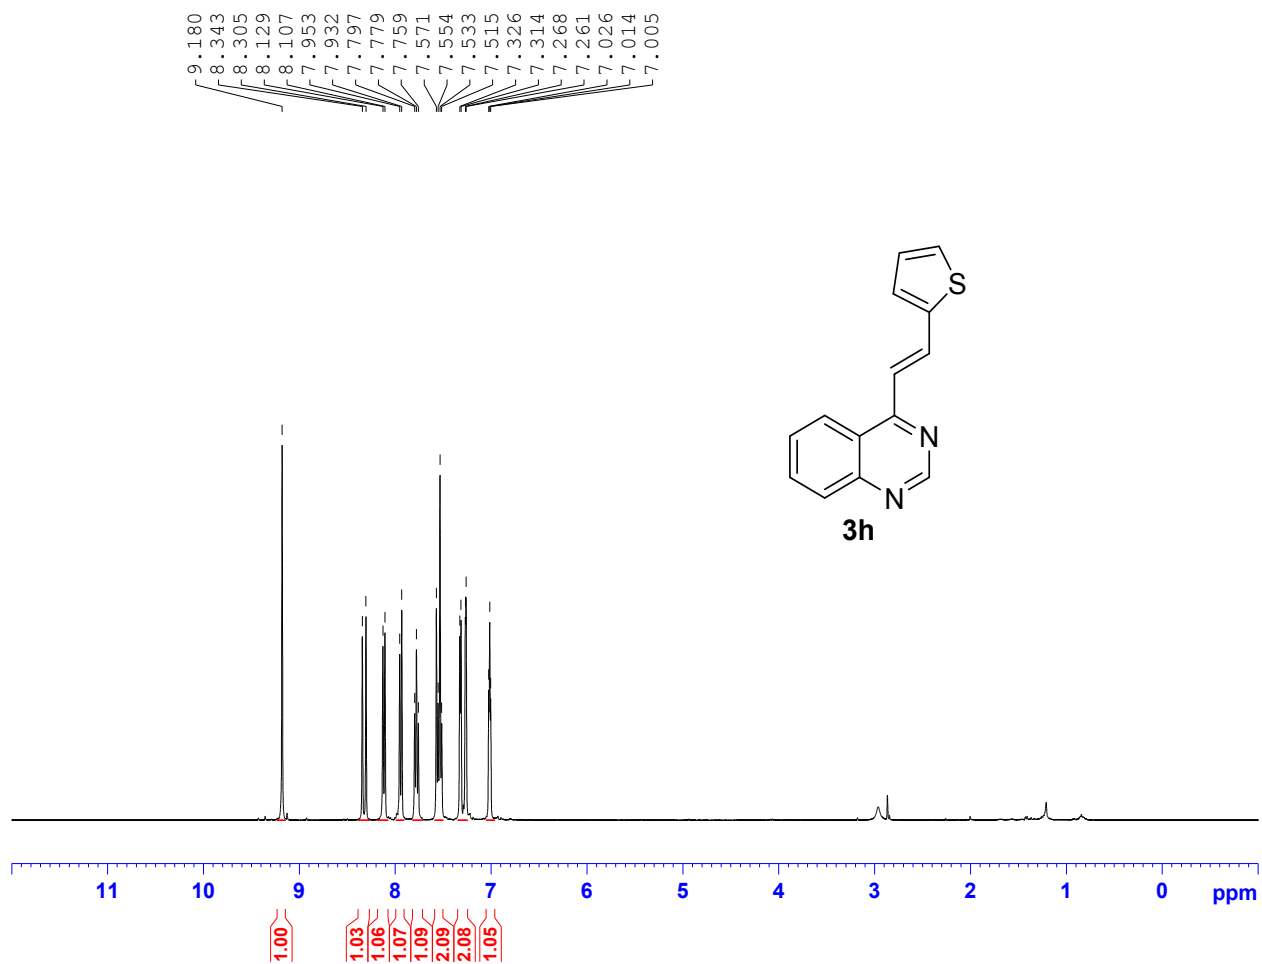



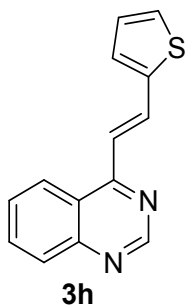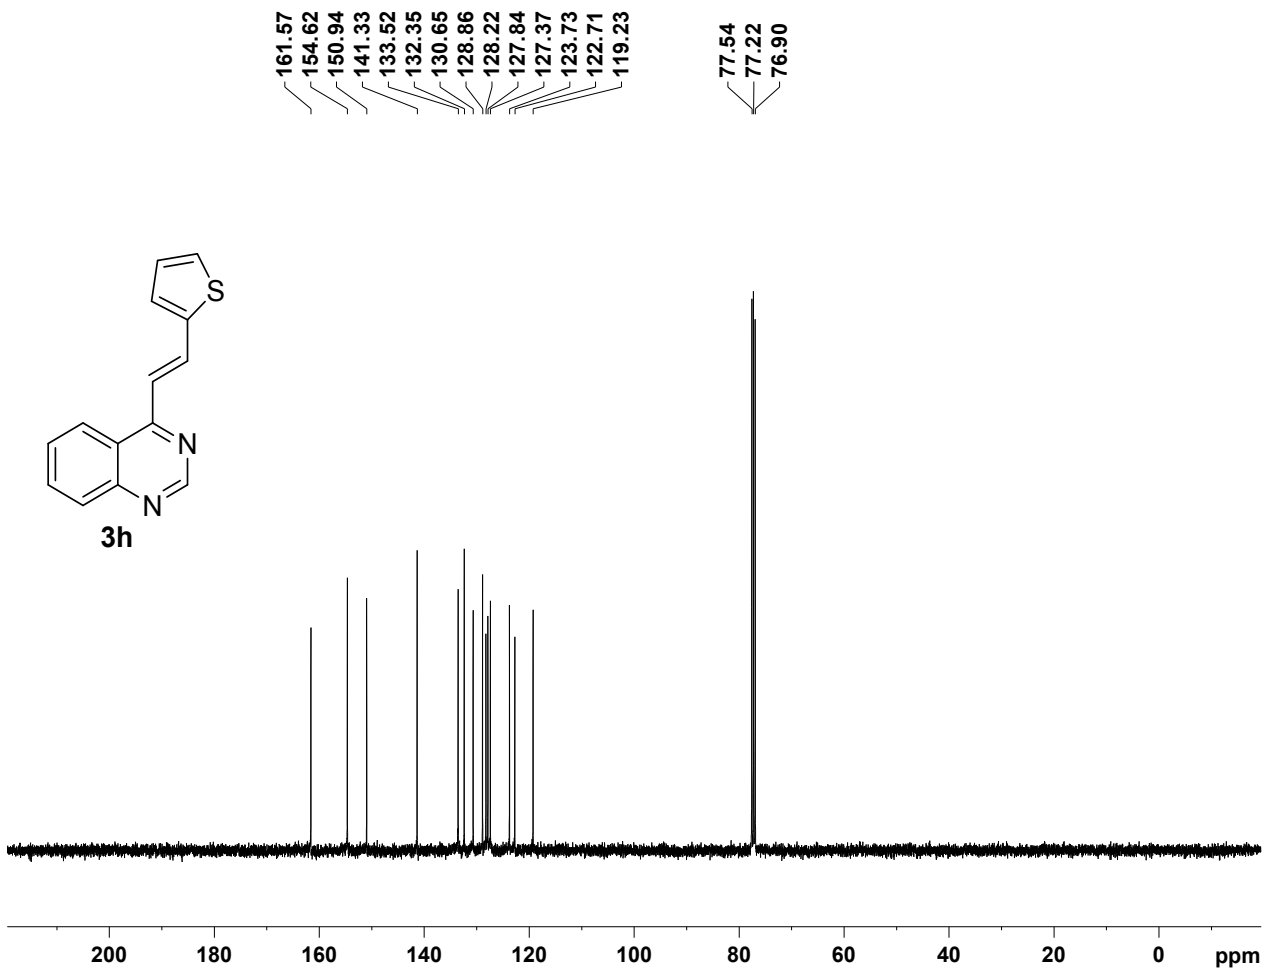

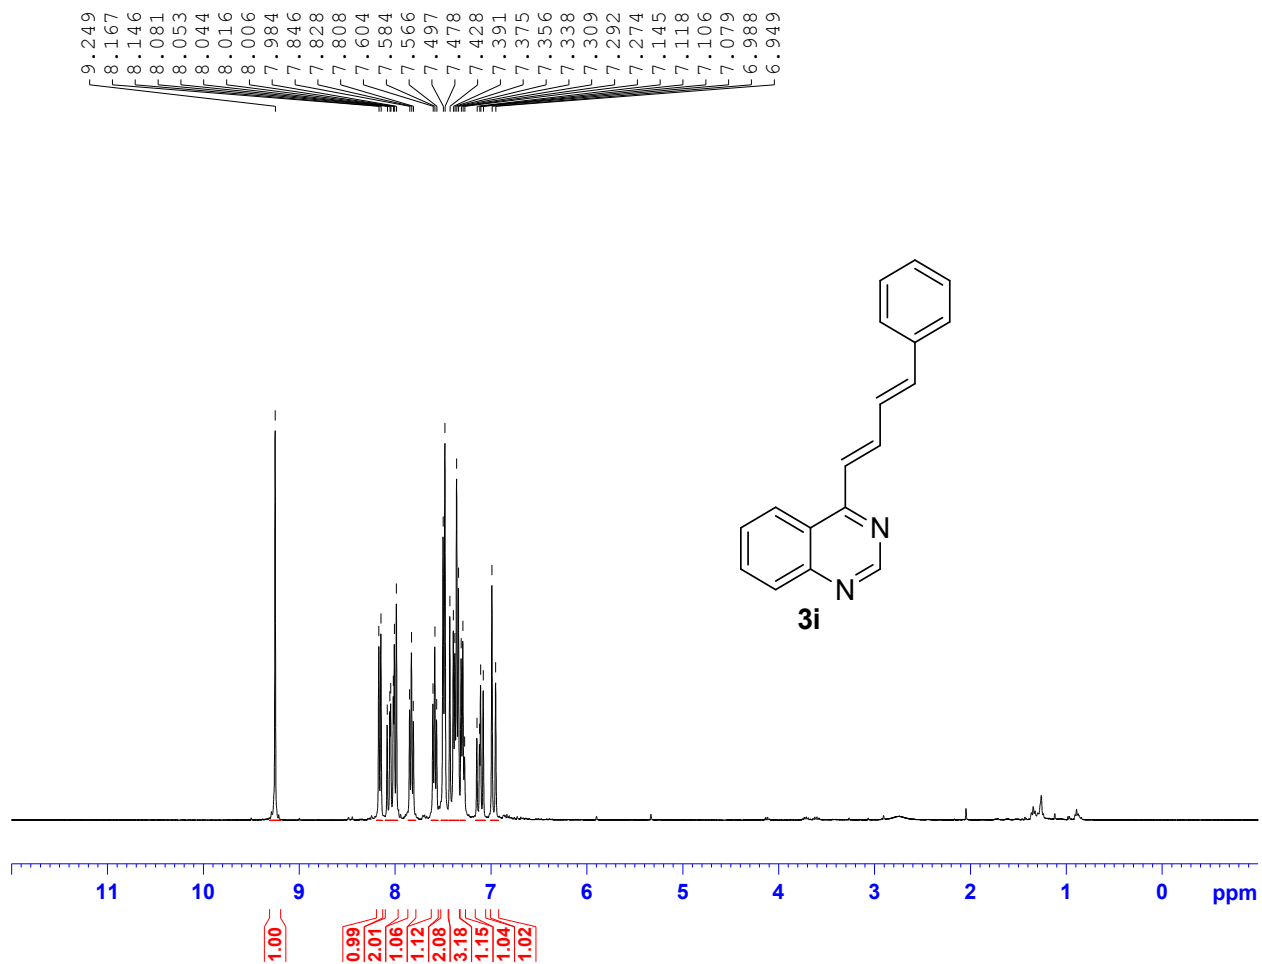

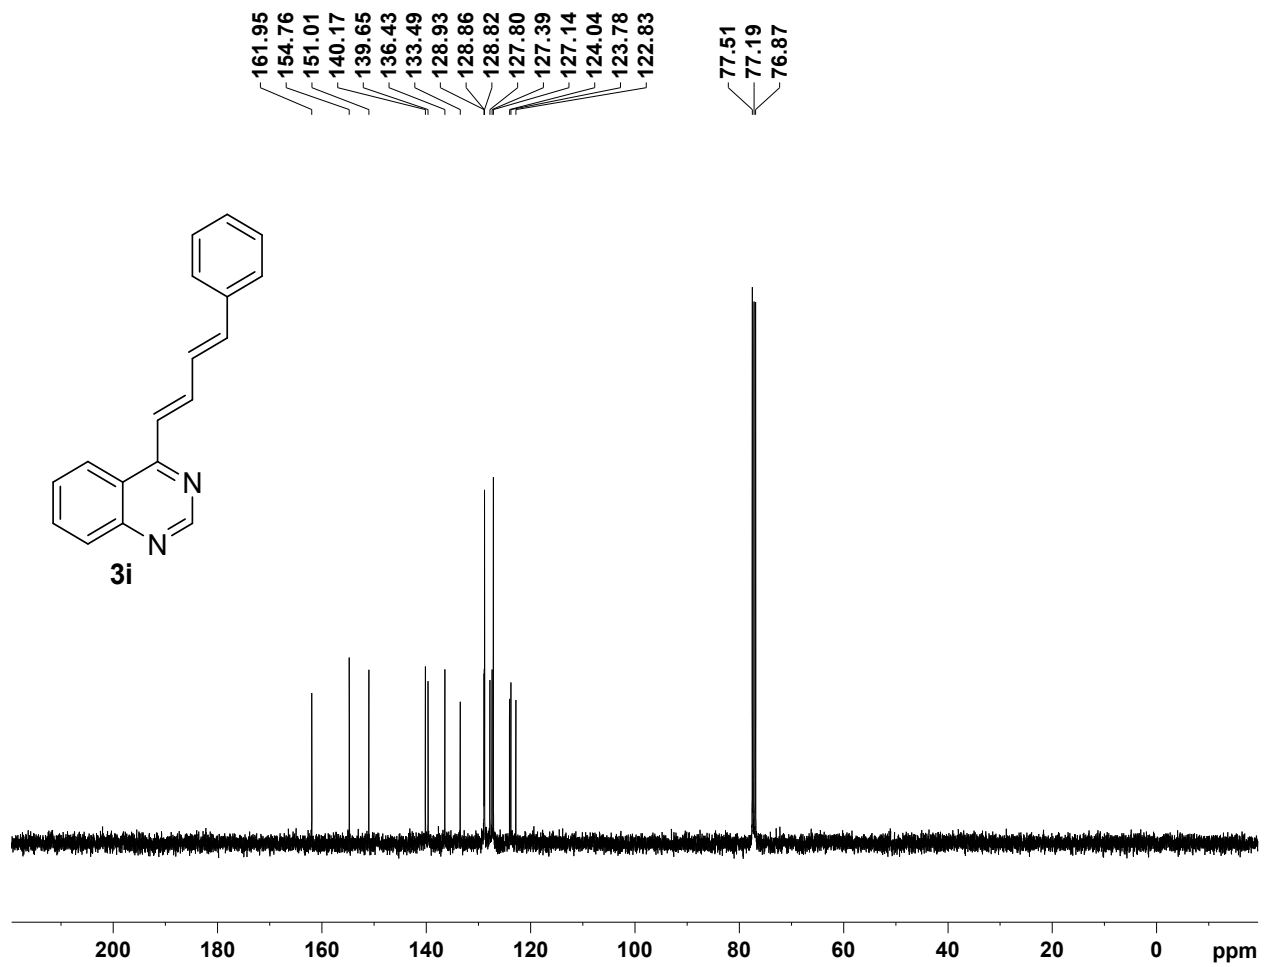

9.307  
8.471  
8.341  
8.303  
7.997  
7.994  
7.975  
7.971  
7.954  
7.932  
7.853  
7.815  
7.773  
7.755  
7.504  
7.487  
7.469  
7.444  
7.426  
7.290

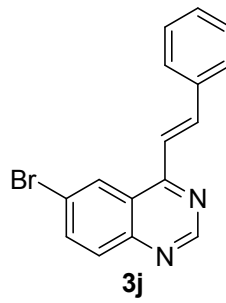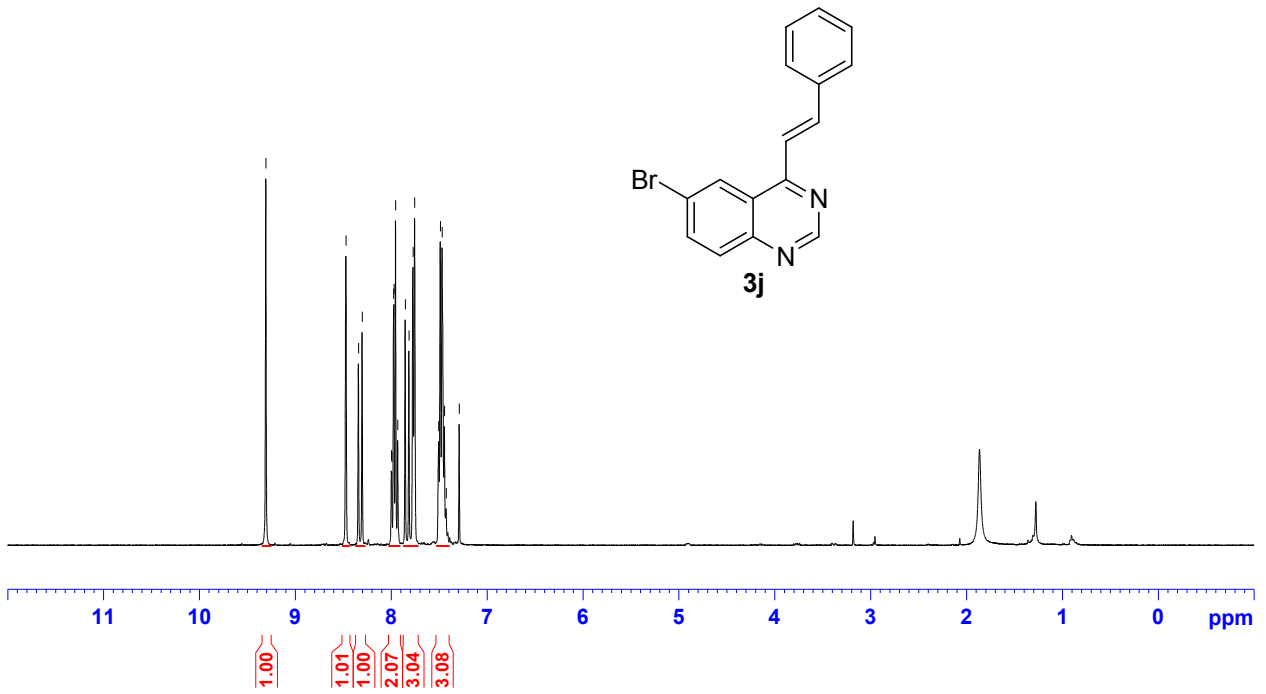

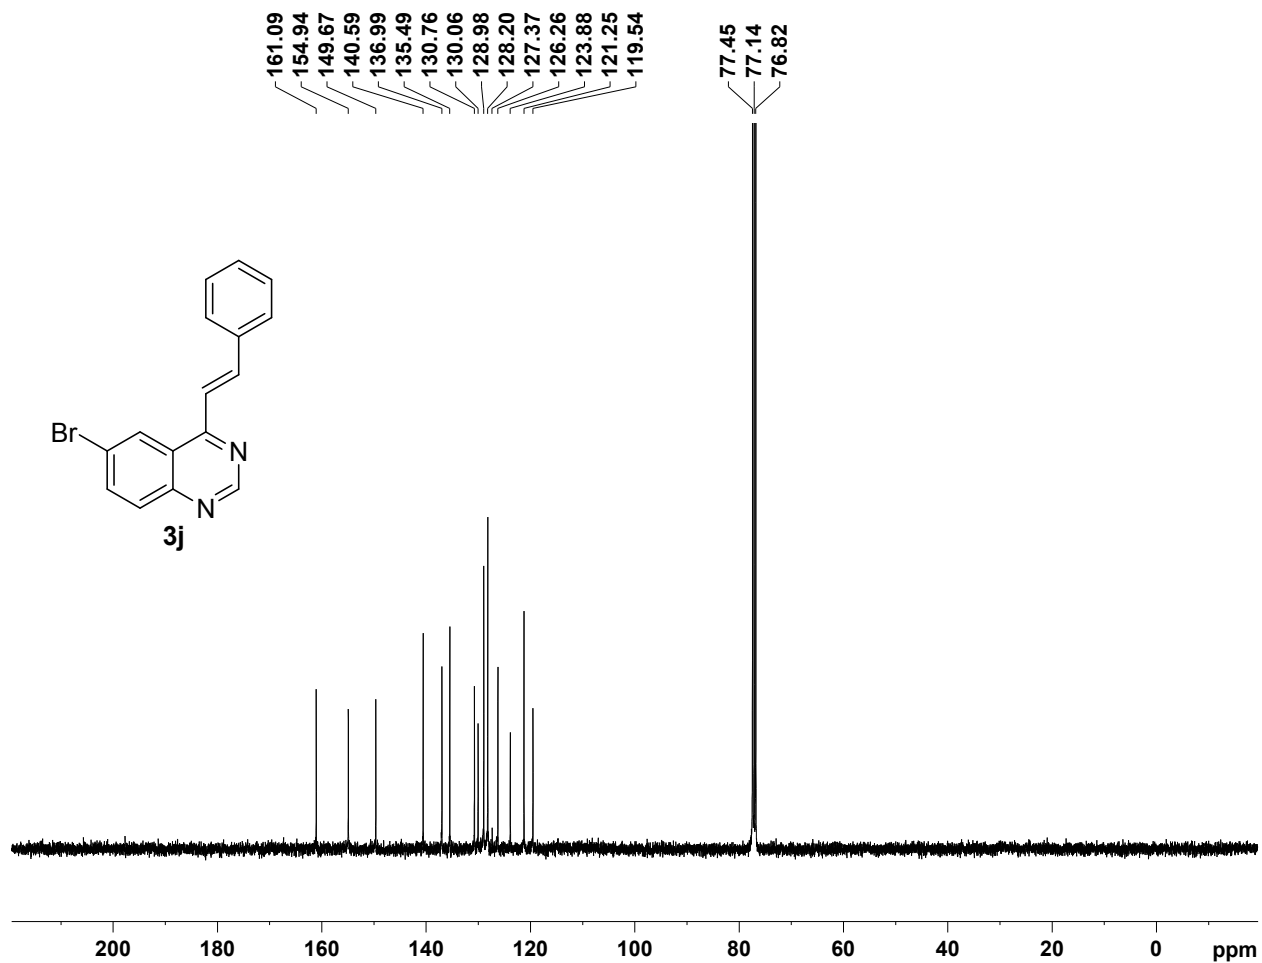

AP-2,4-DBR-QZ-CH-1H  
290818-593

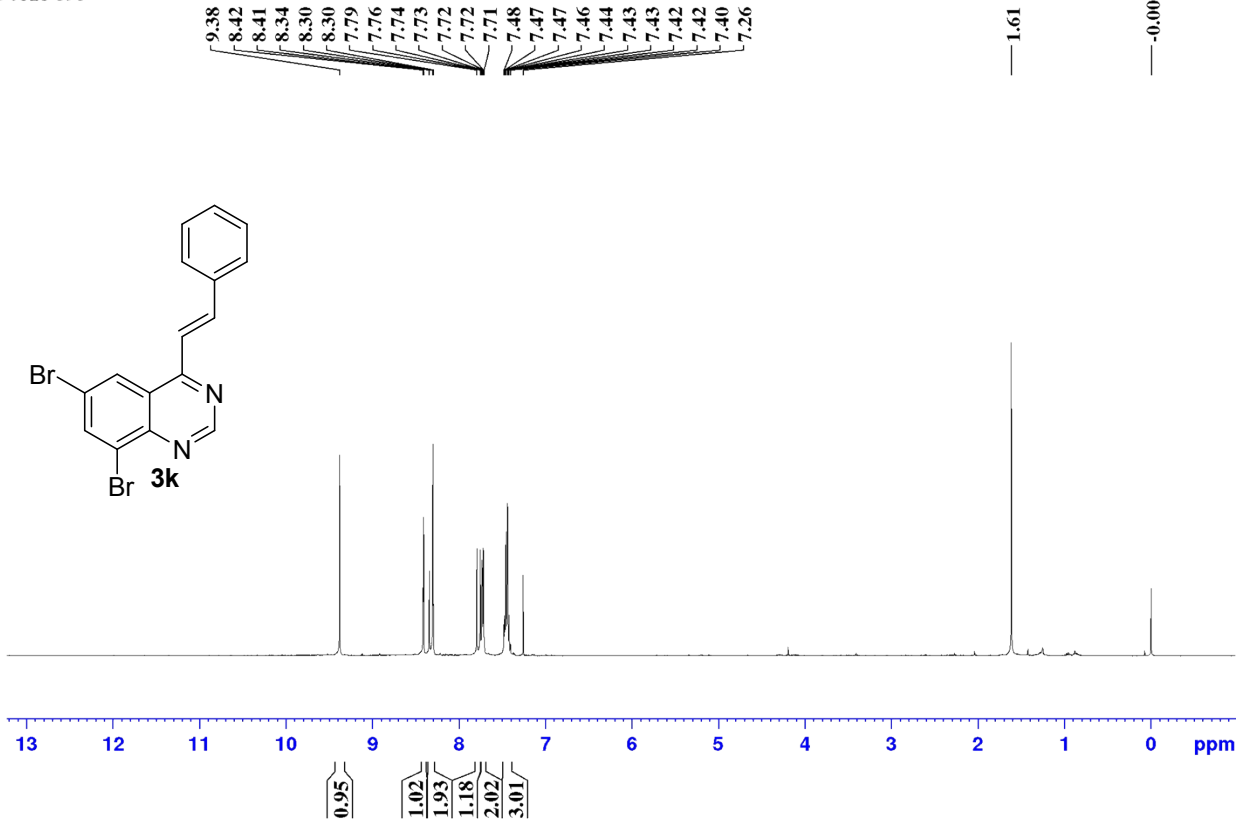

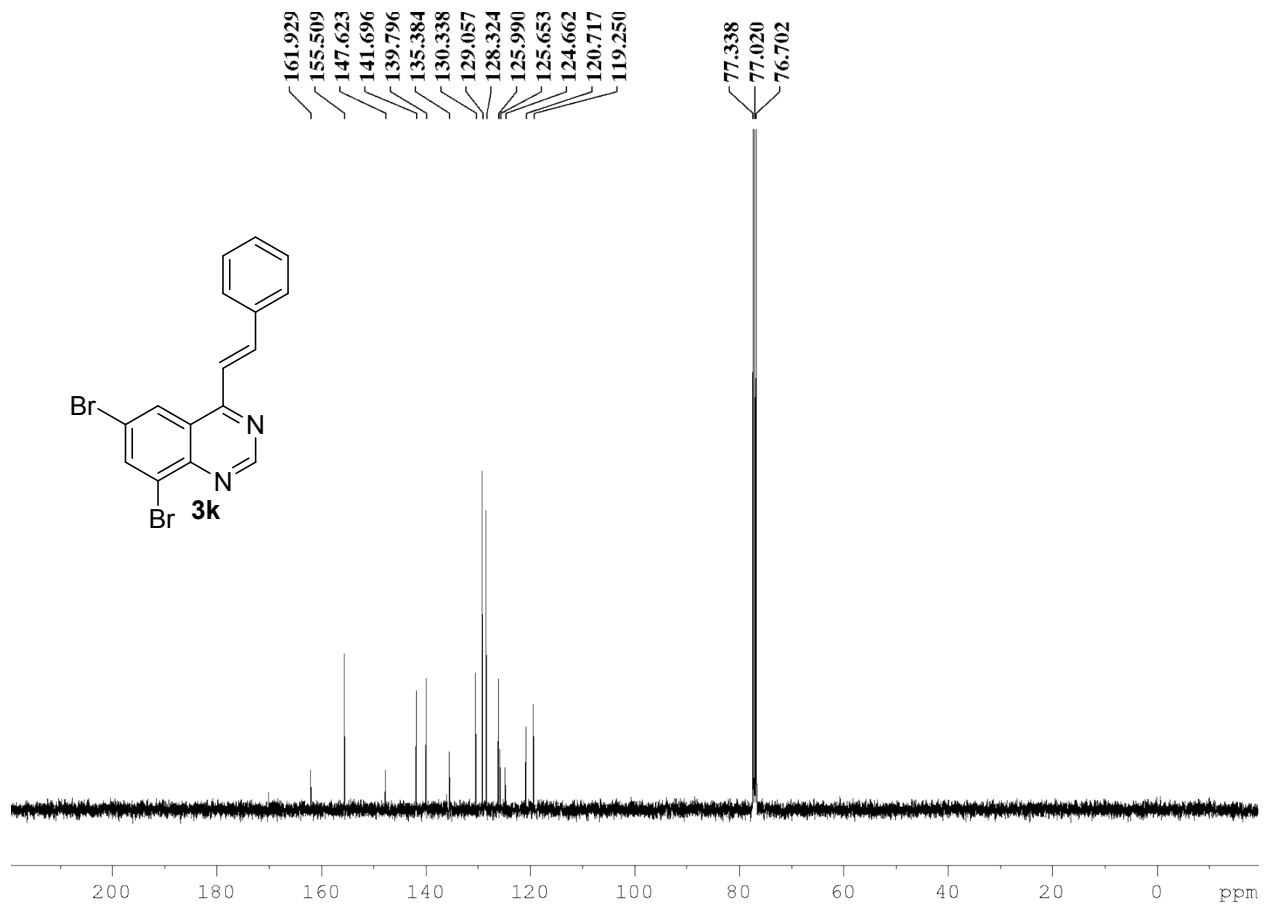

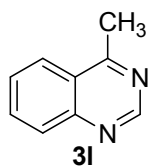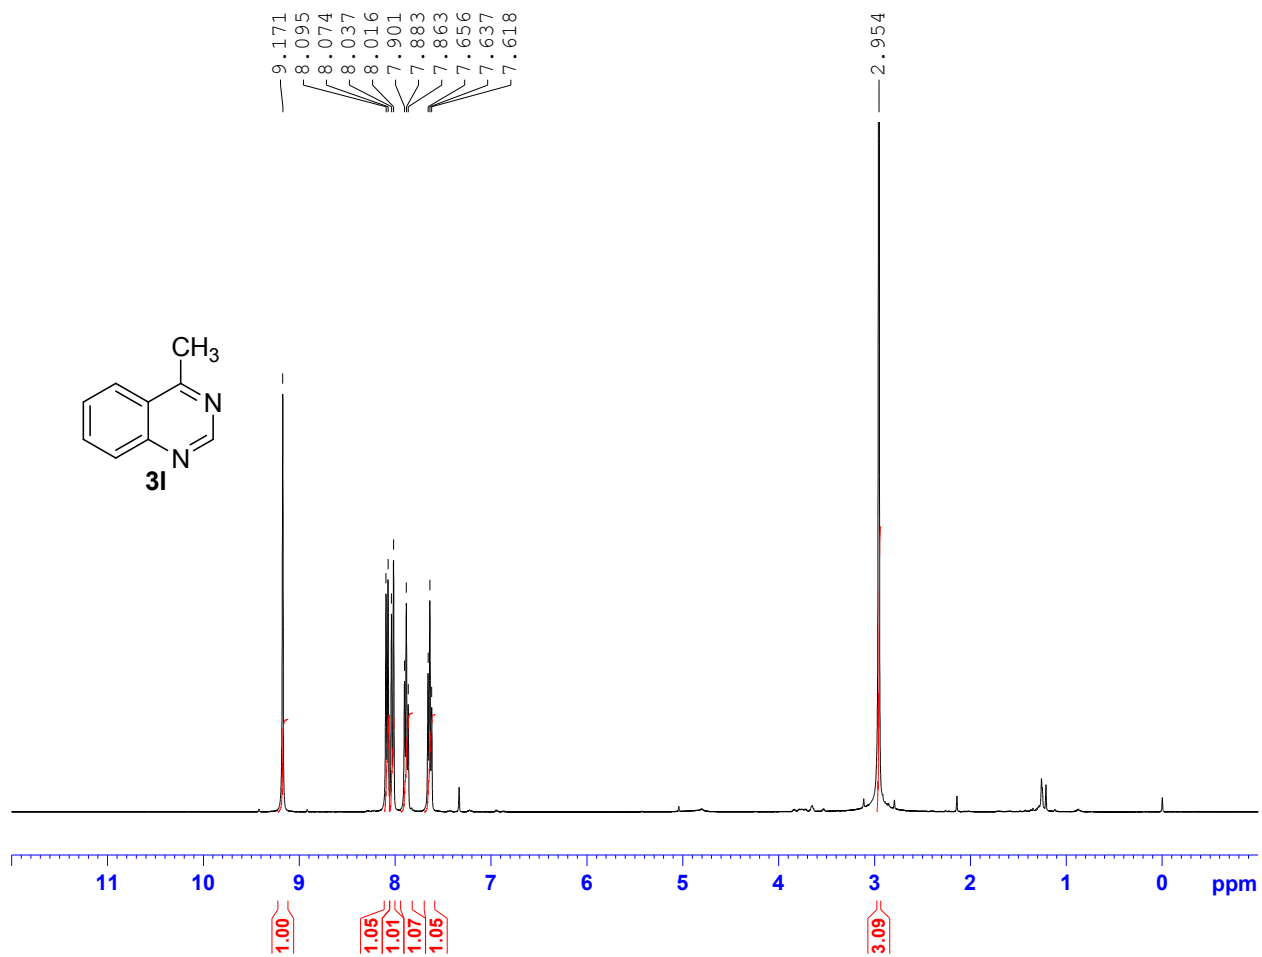



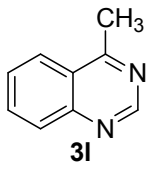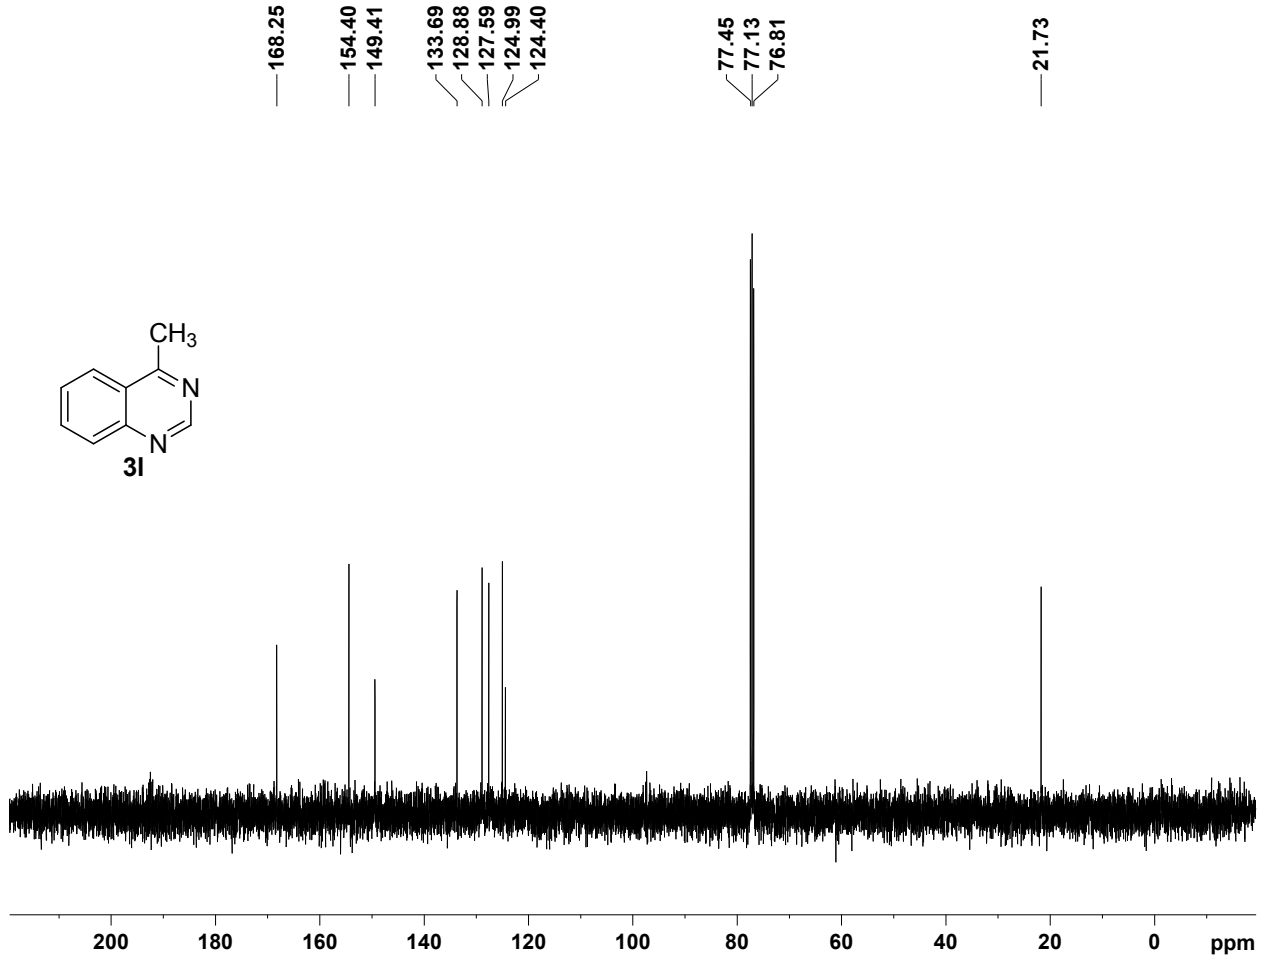

AP-2,4-DBR-QZ-PDT-1H

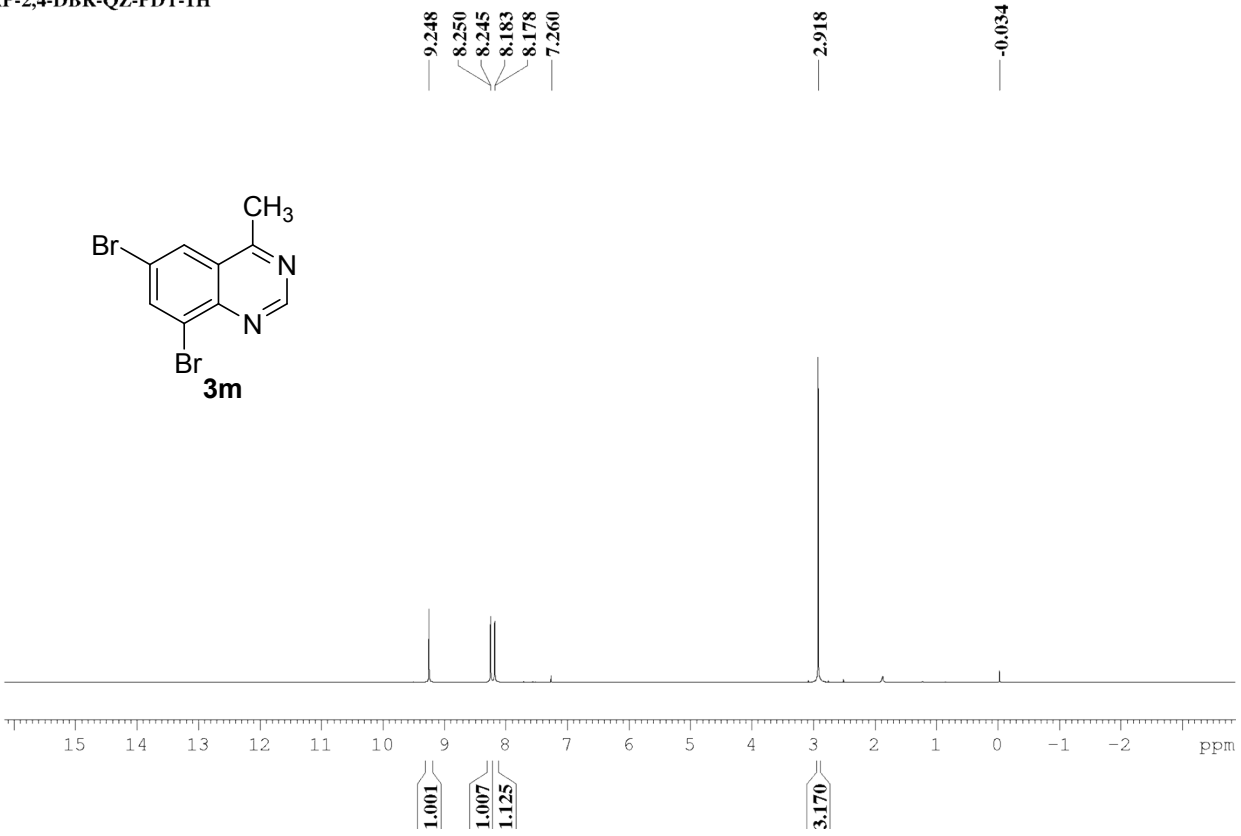

AP-2,4-DBR-QZ-PDT-13C  
290818-588

168.07  
155.28  
146.10  
139.82  
127.01  
126.12  
125.62  
120.84  
77.38  
77.06  
76.74  
21.97

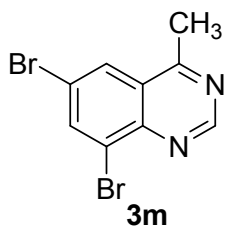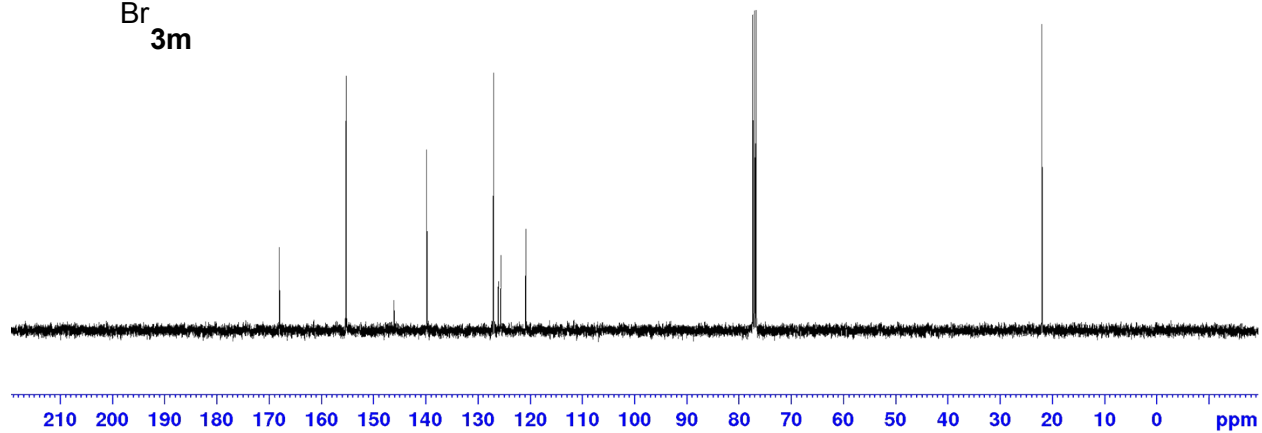

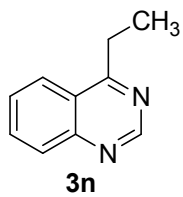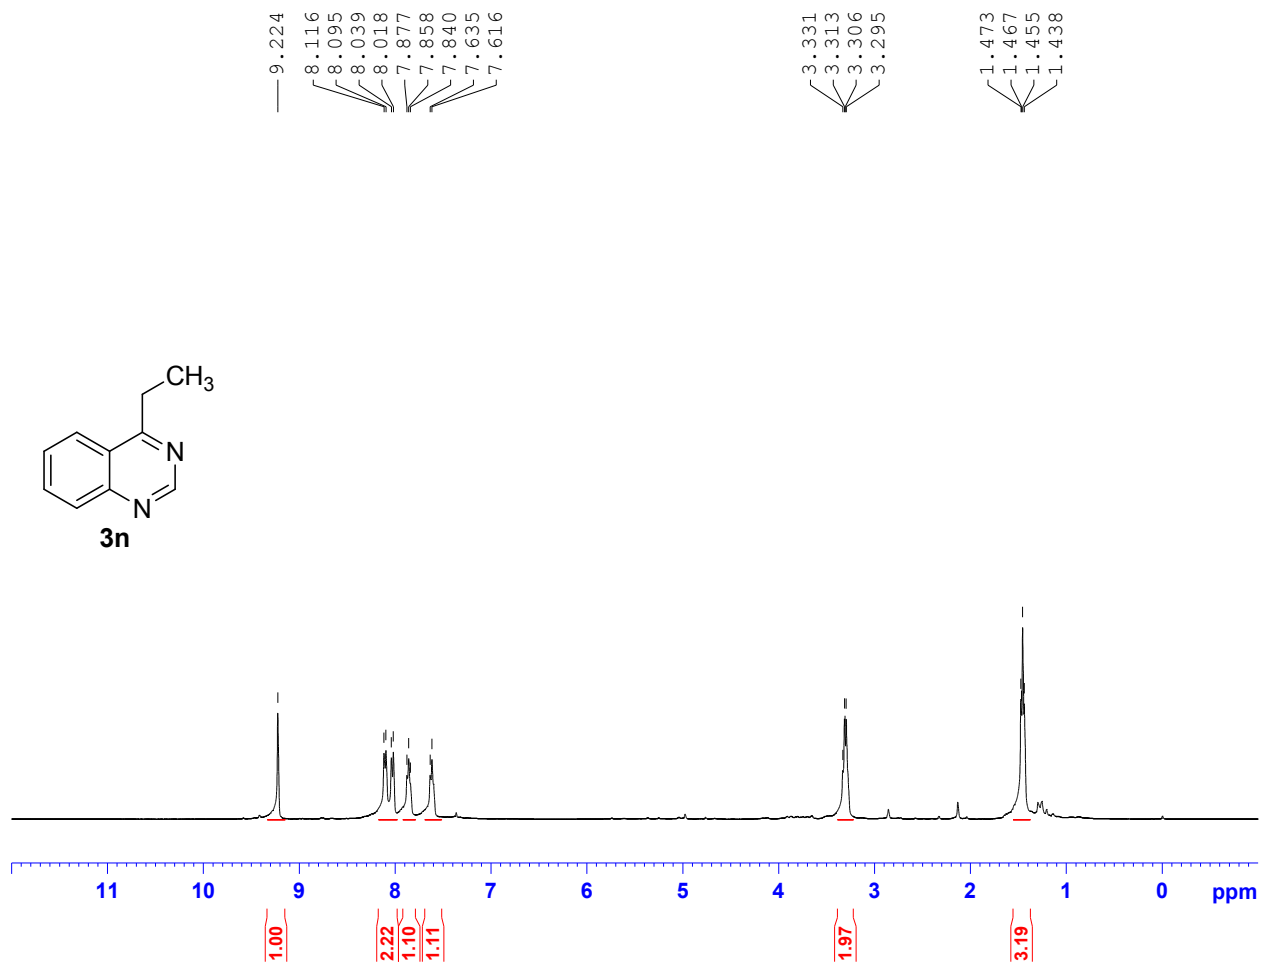

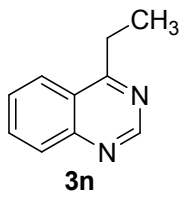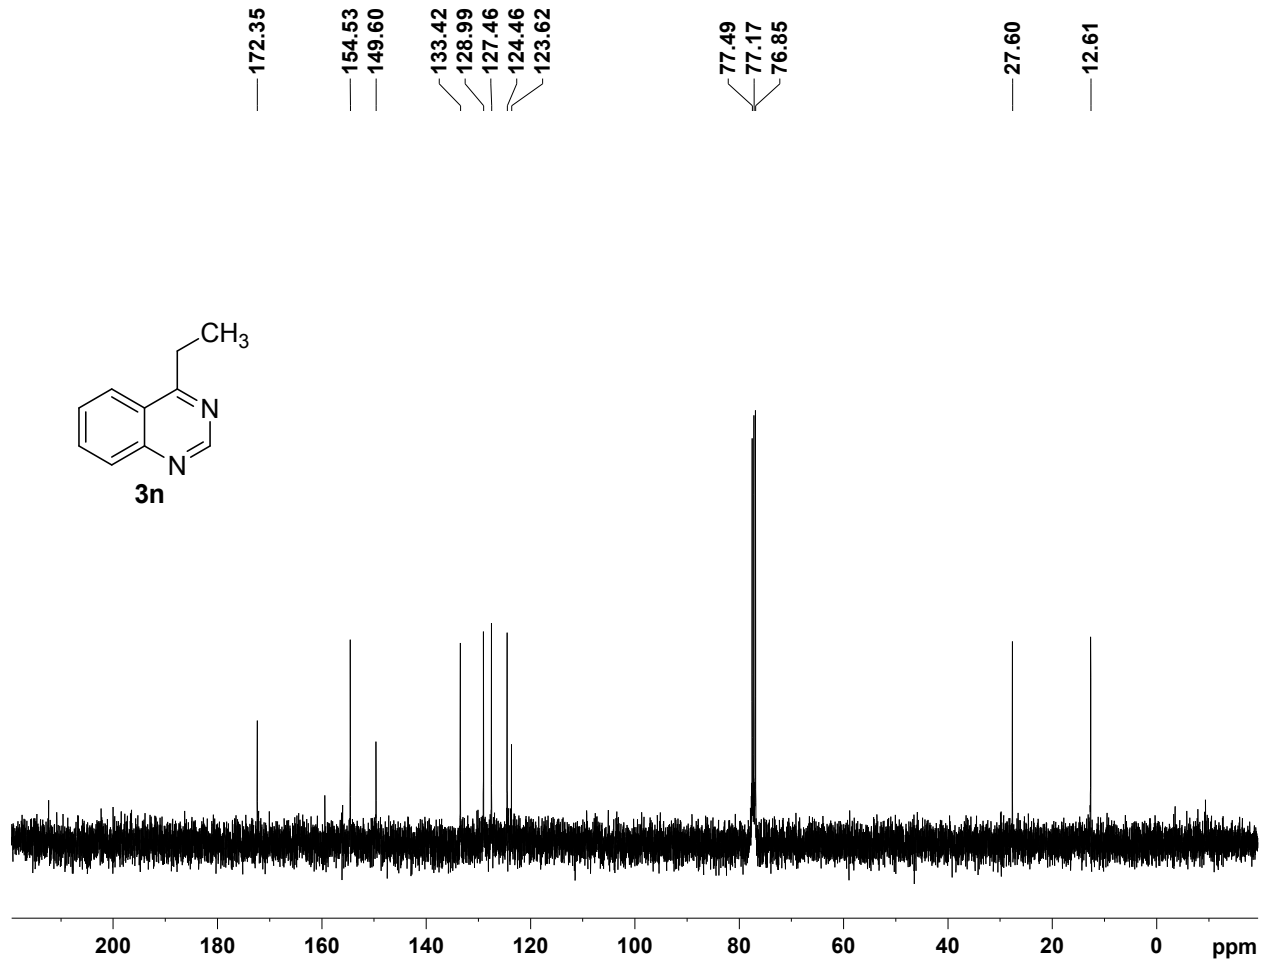

AP-Q-Ben-1H  
200618-408

9.385  
8.149  
8.132  
8.127  
8.114  
7.944  
7.940  
7.926  
7.923  
7.905  
7.902  
7.797  
7.788  
7.784  
7.779  
7.773  
7.767  
7.638  
7.636  
7.617  
7.597  
7.593  
7.588  
7.580  
7.572  
7.562  
7.259

-0.007

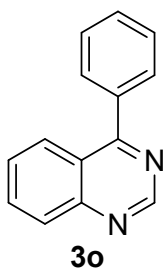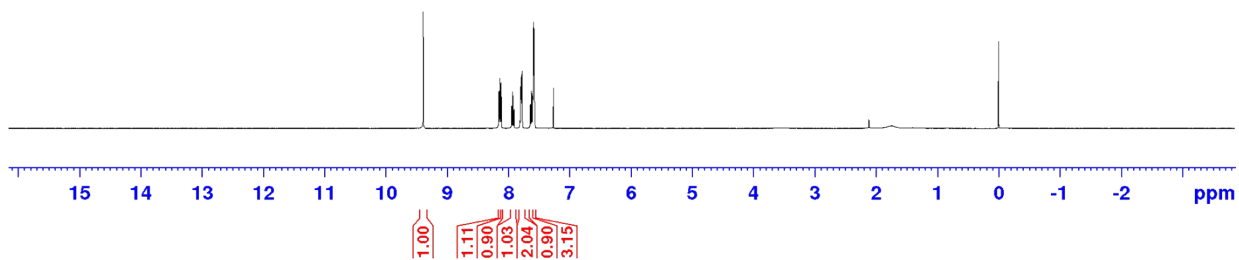

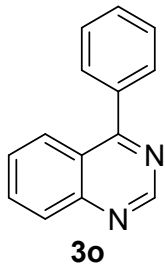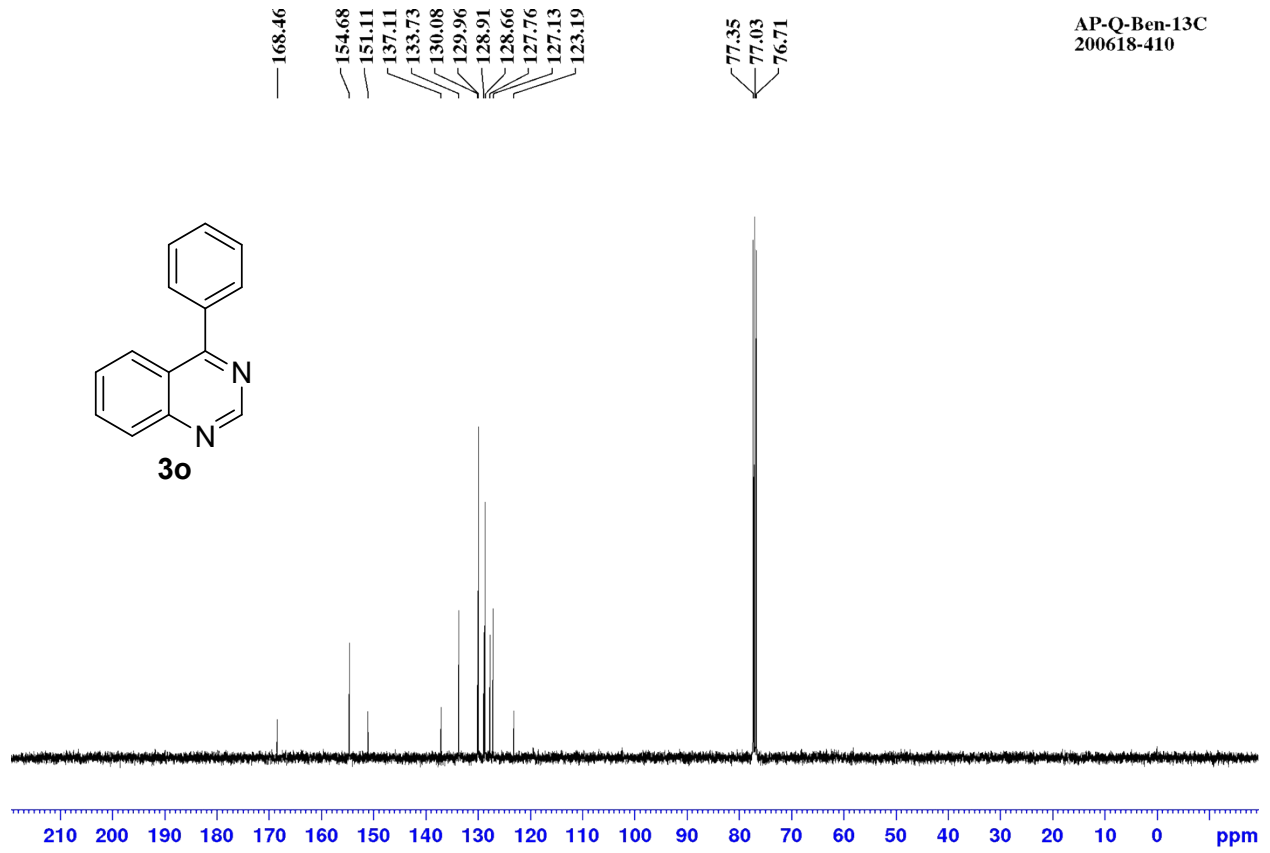

AP-5Cl-QZ-SM-1H  
161018-651

9.372  
8.100  
8.095  
8.068  
8.045  
7.849  
7.844  
7.827  
7.821  
7.785  
7.775  
7.767  
7.765  
7.761  
7.758  
7.751  
7.740  
7.602  
7.594  
7.585  
7.581

— 0.001

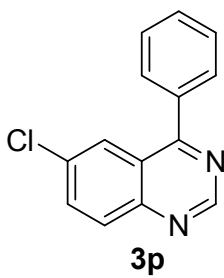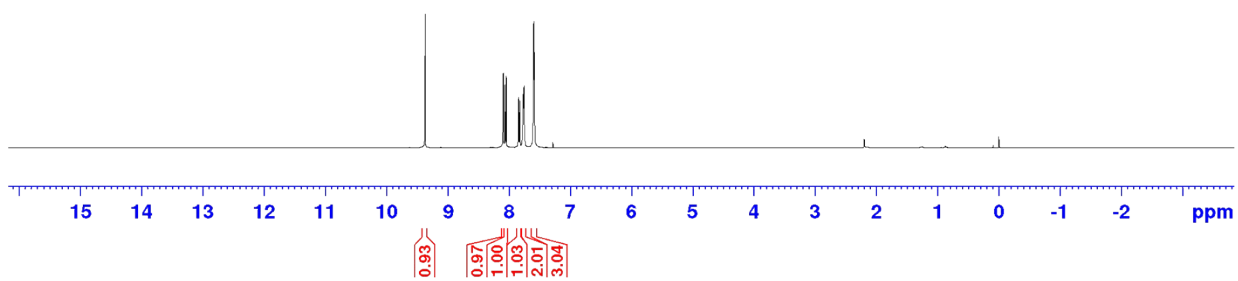



AP-5Cl-QZ-SM-13C  
161018-654

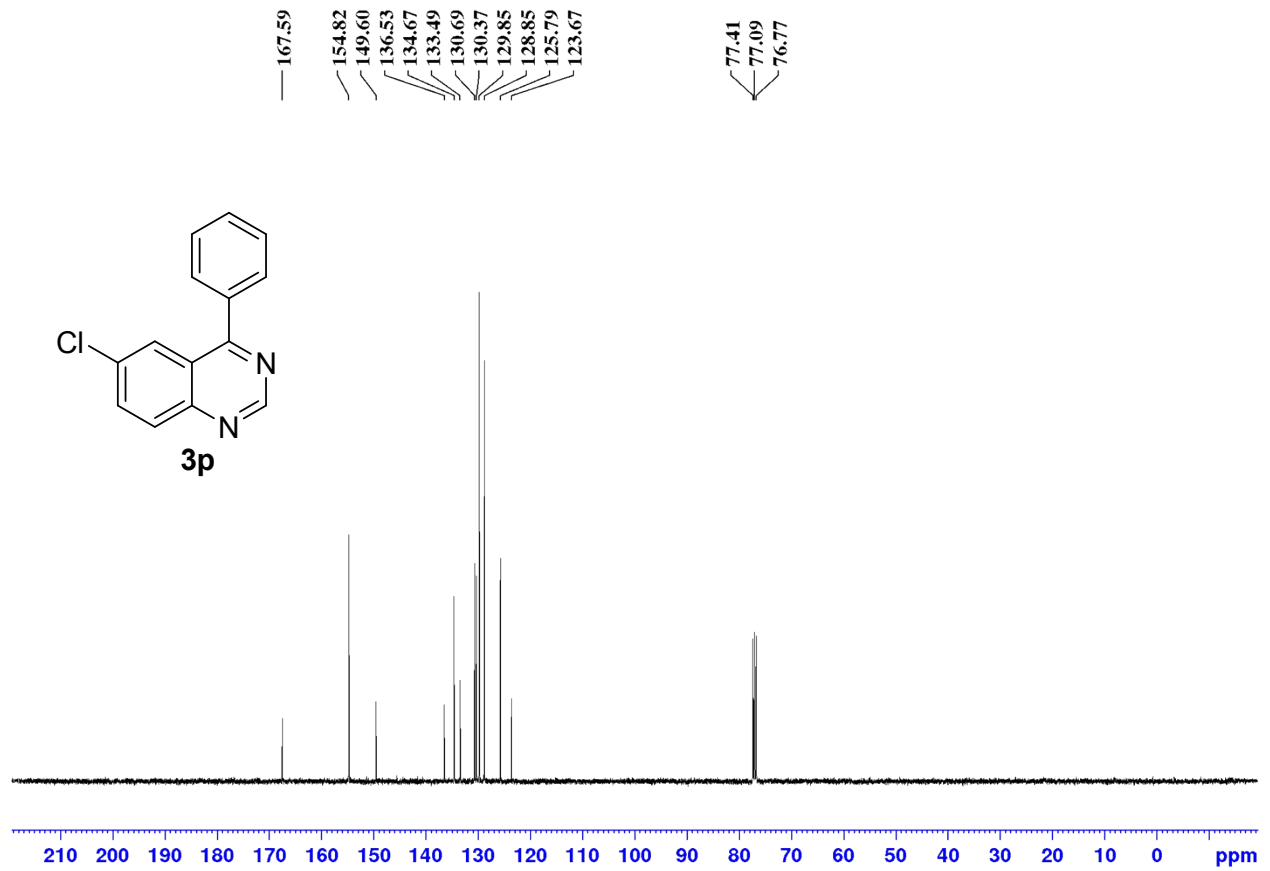

AP-5NO2-QZ-SM-1H  
16102018-653

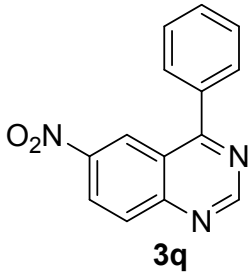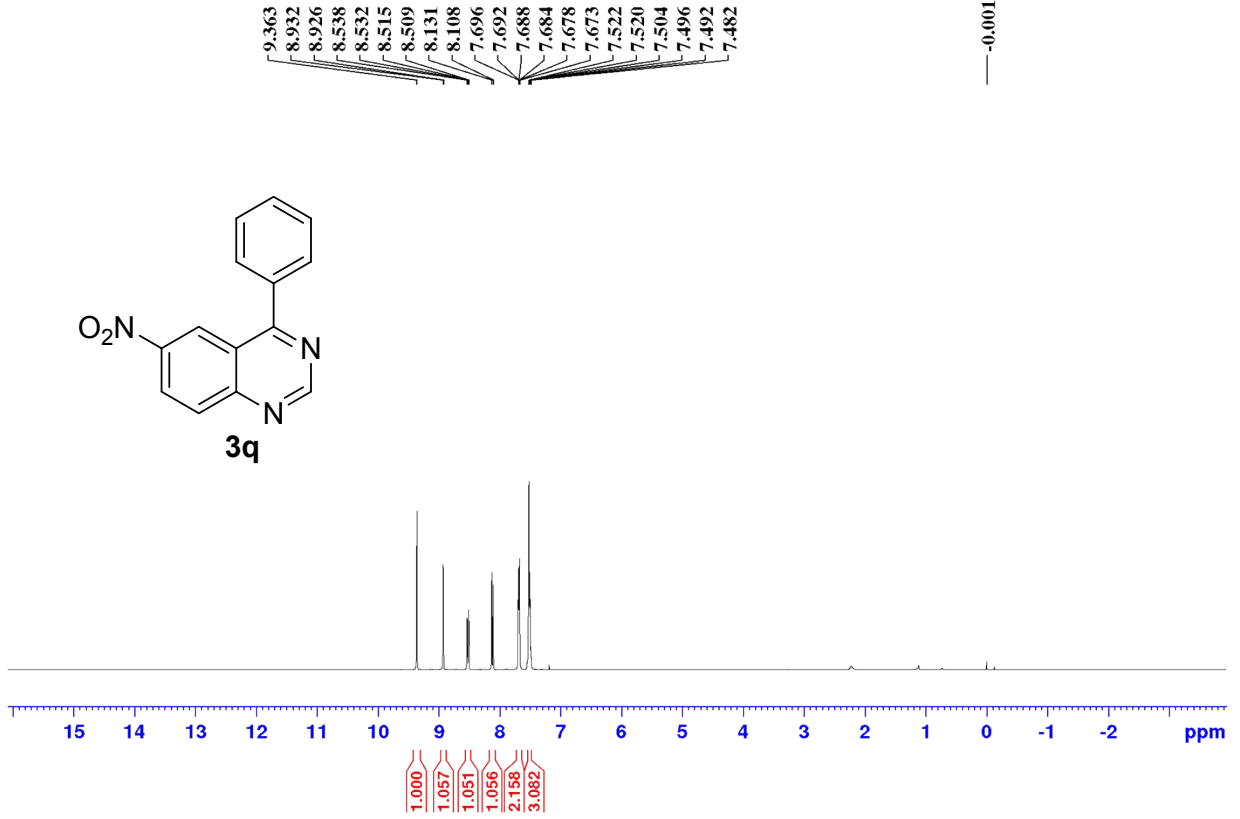

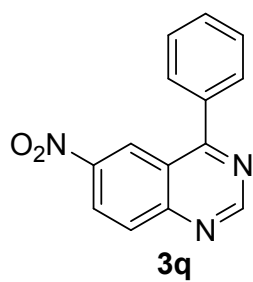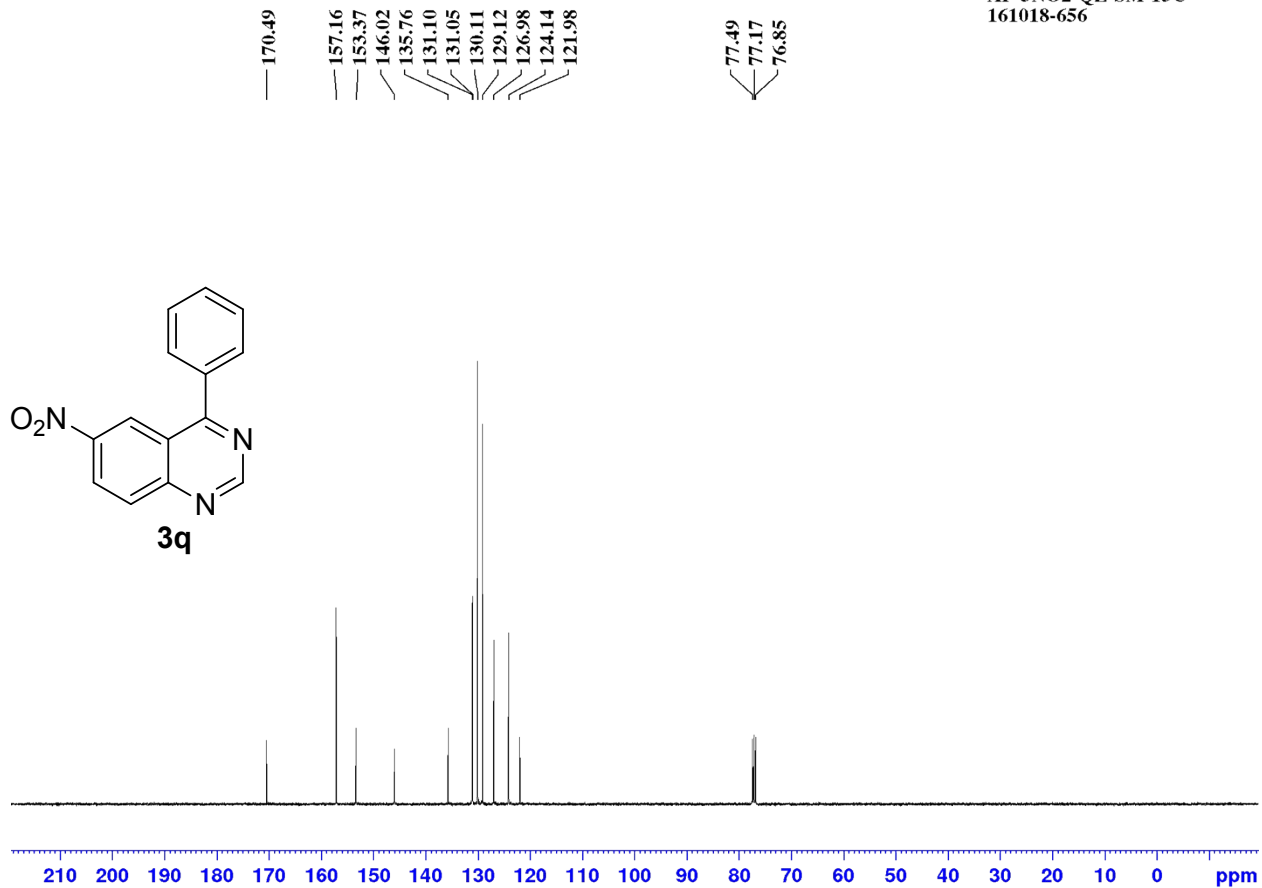

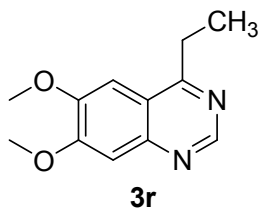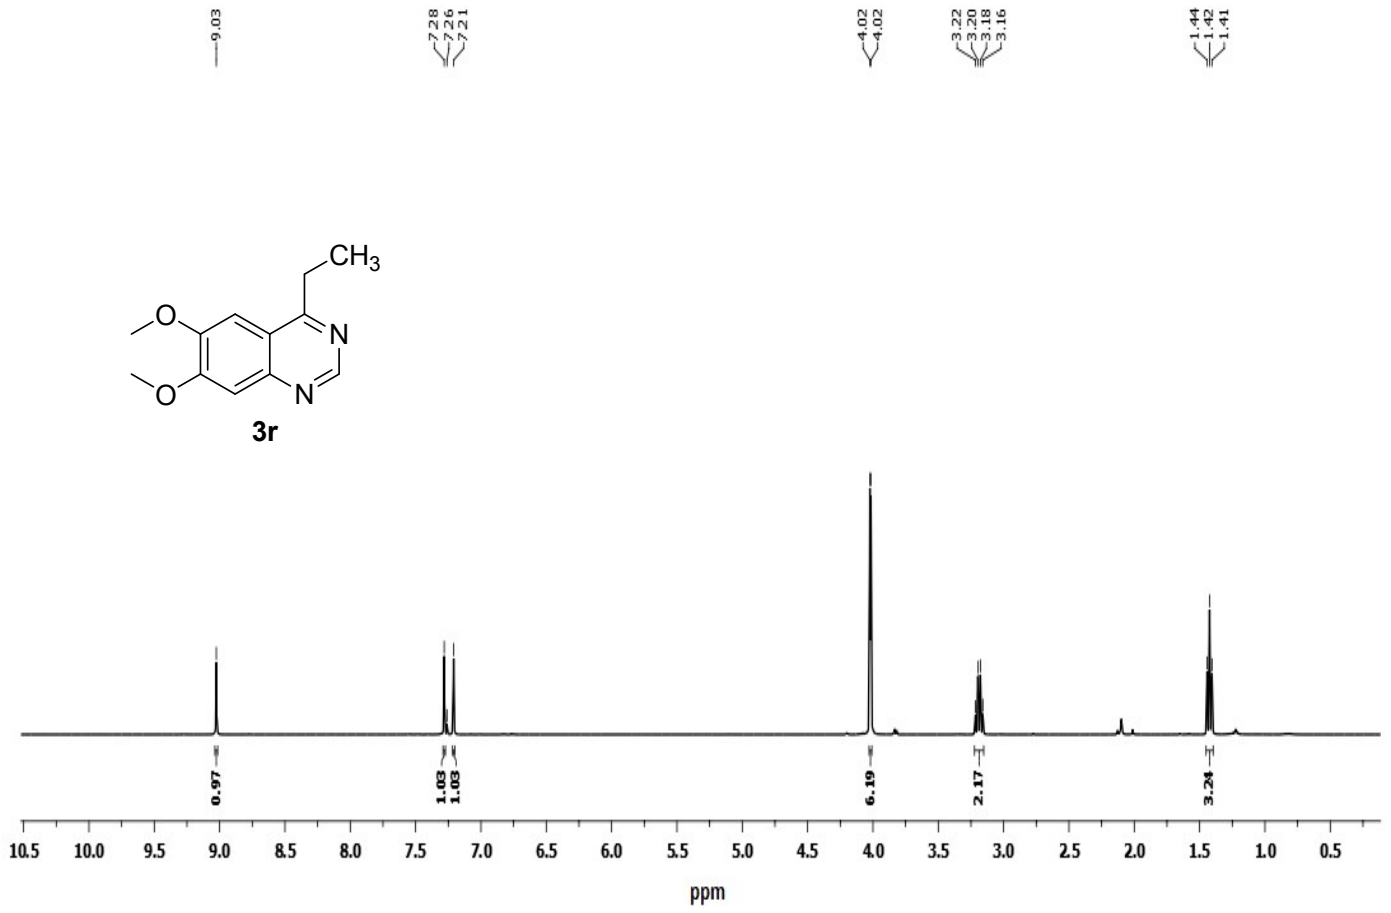

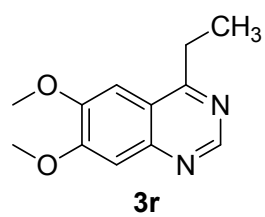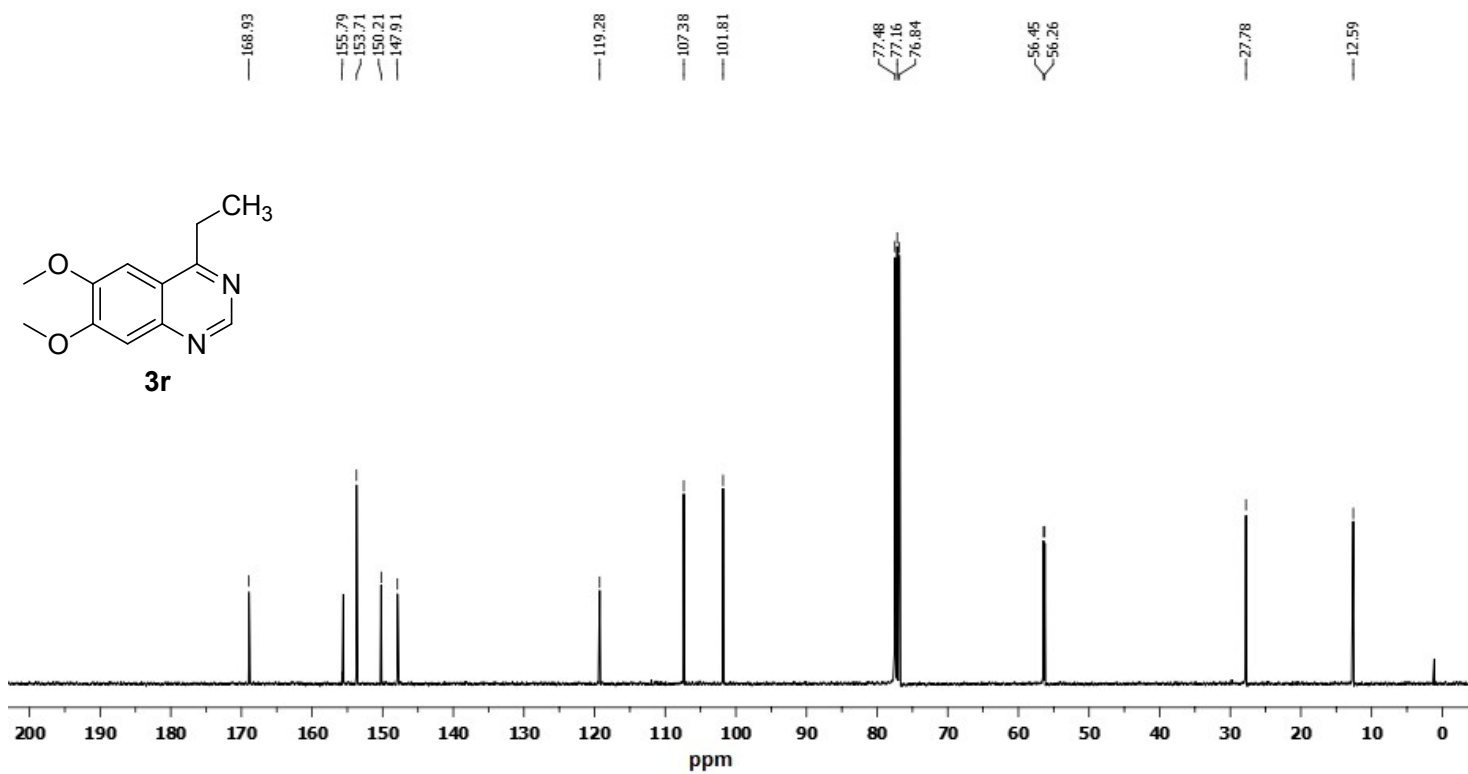

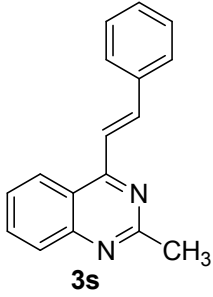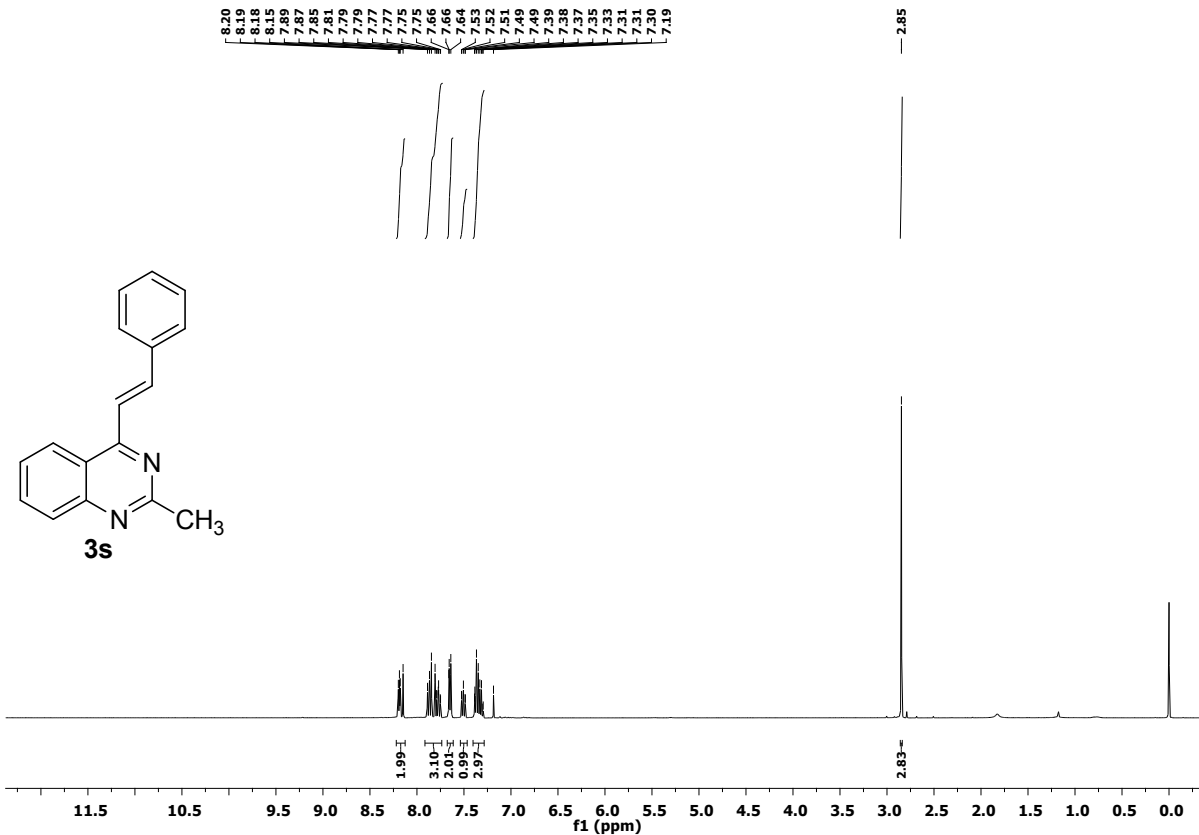

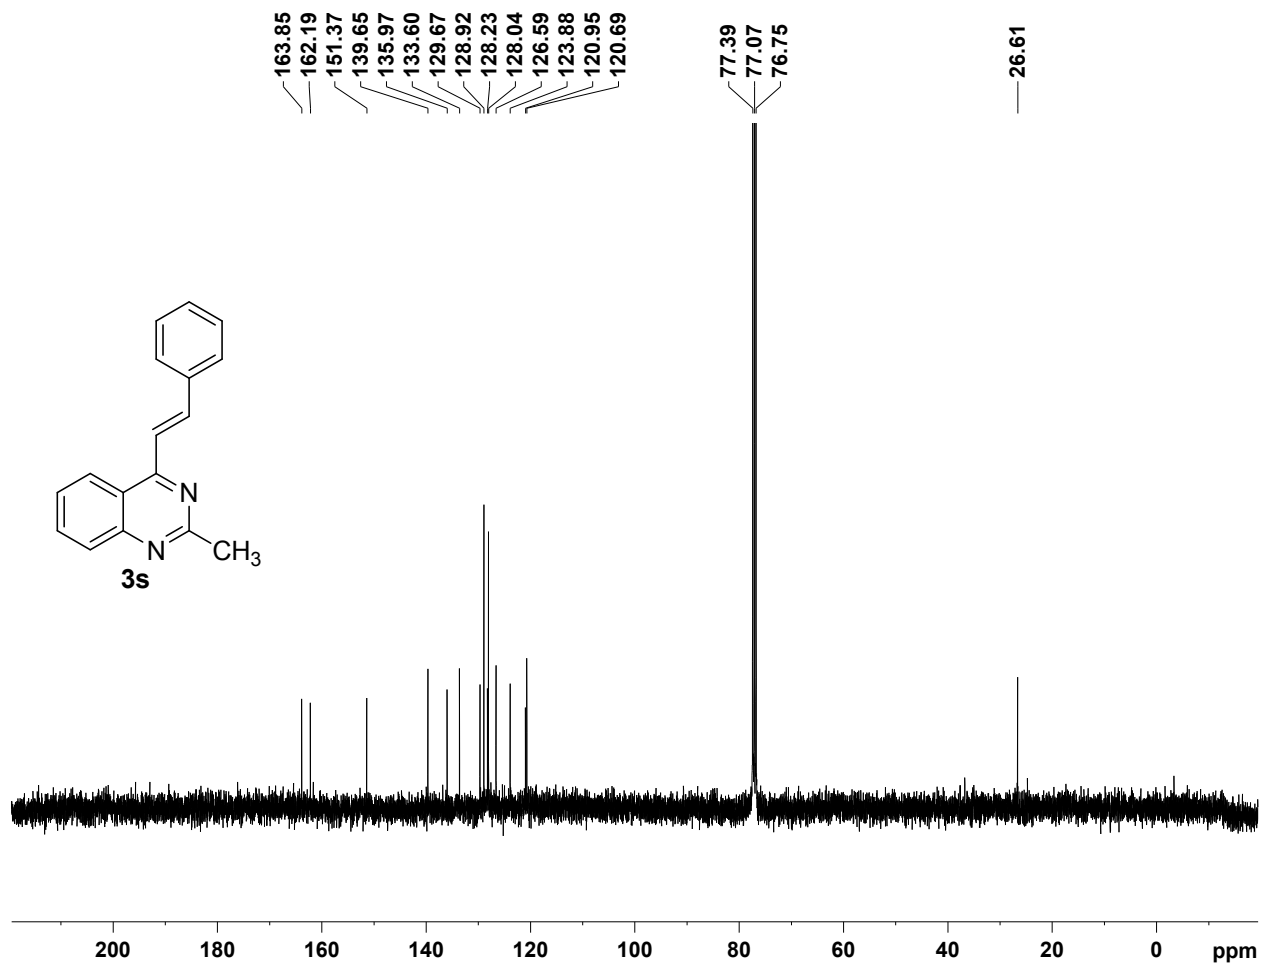

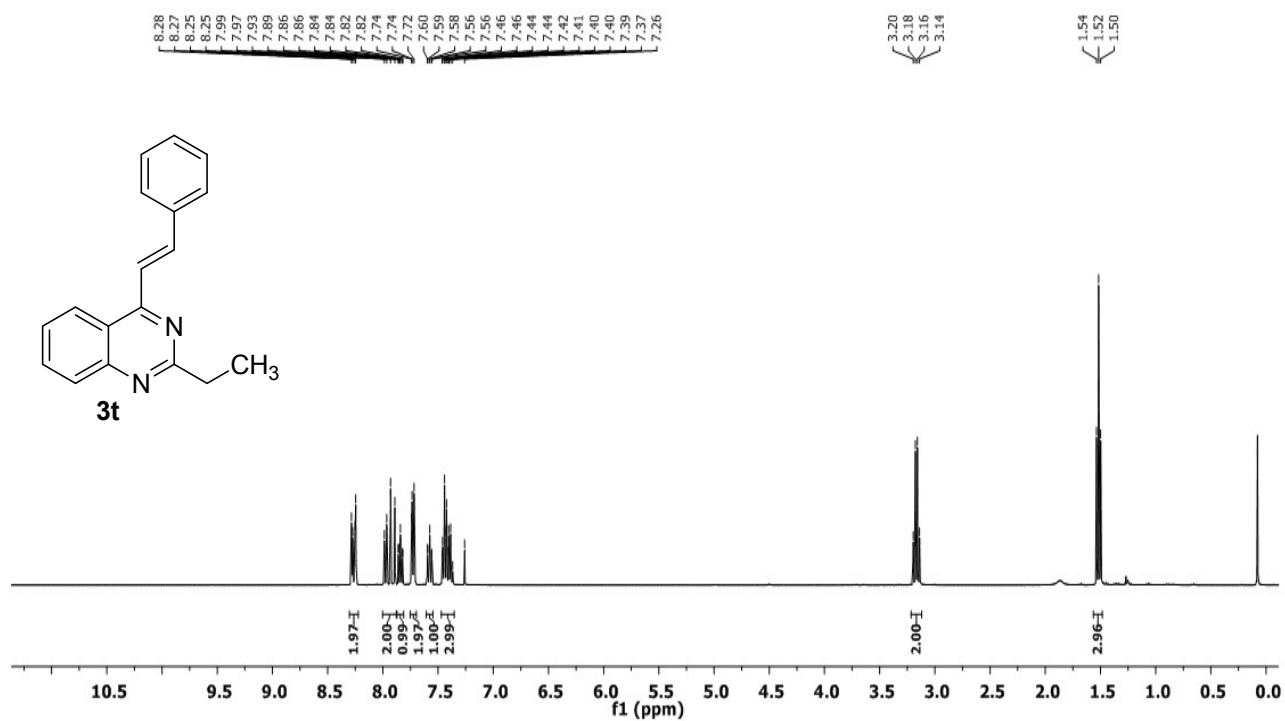



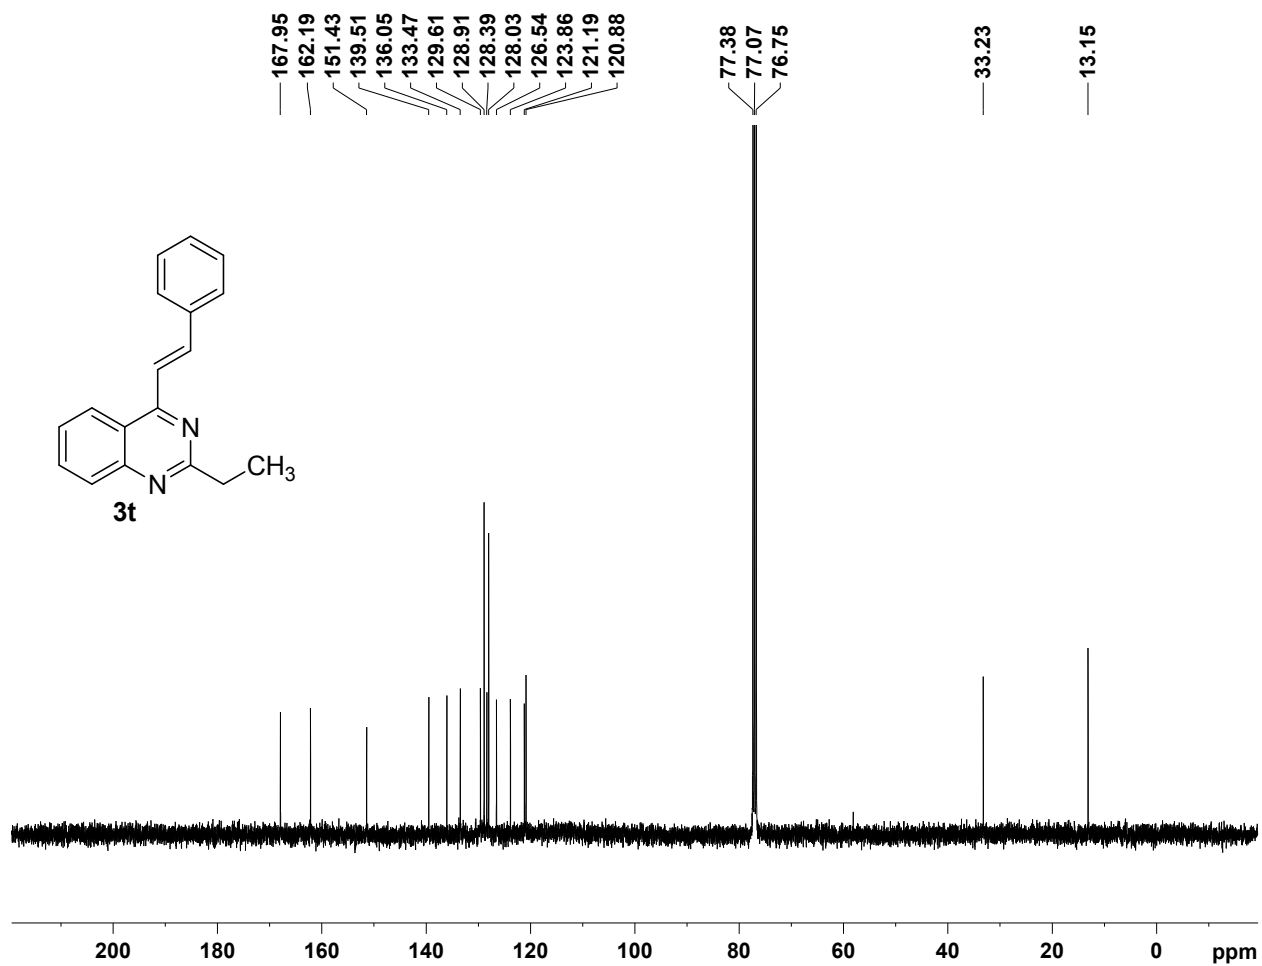

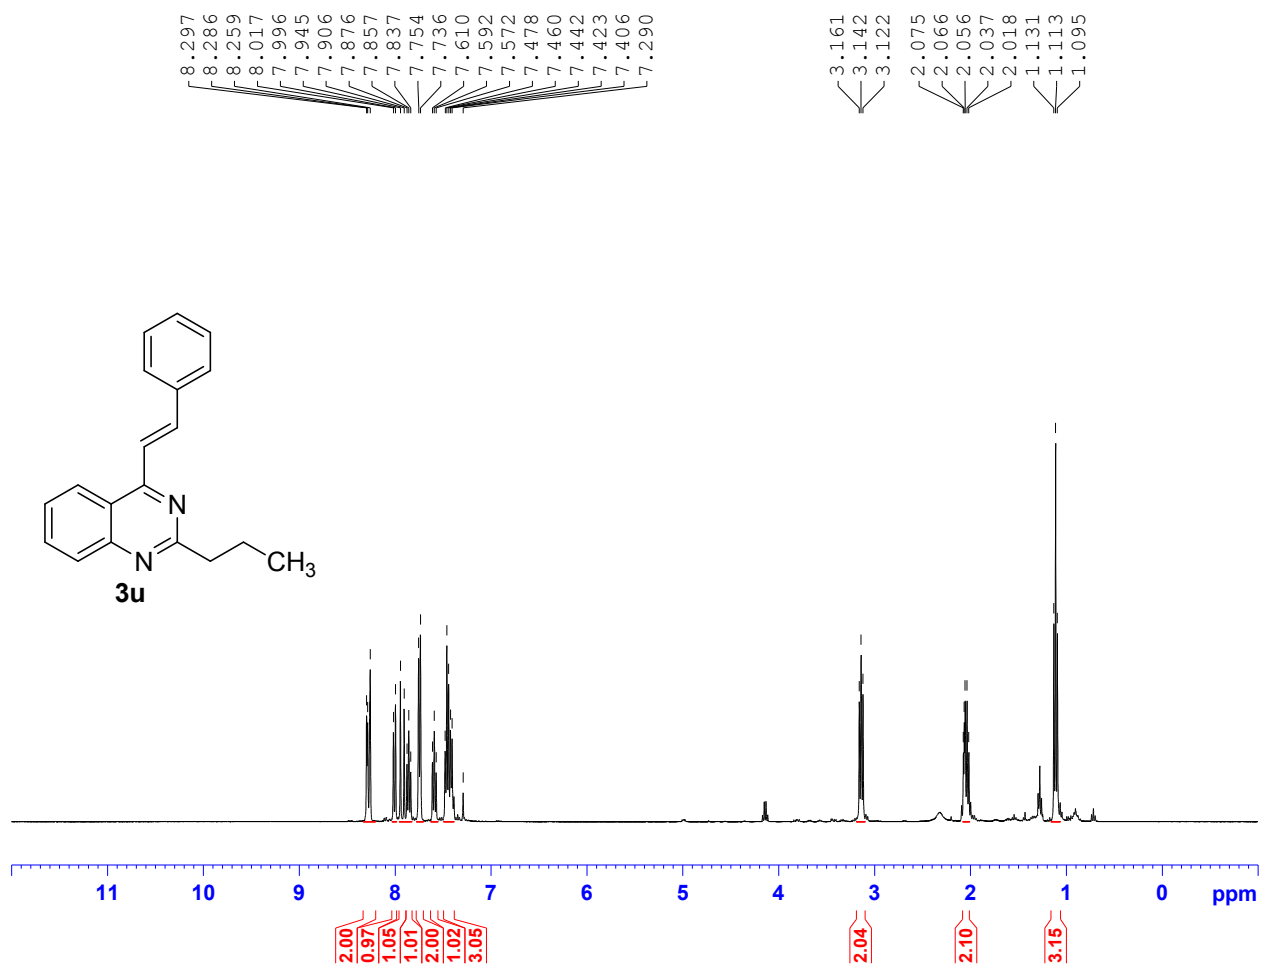

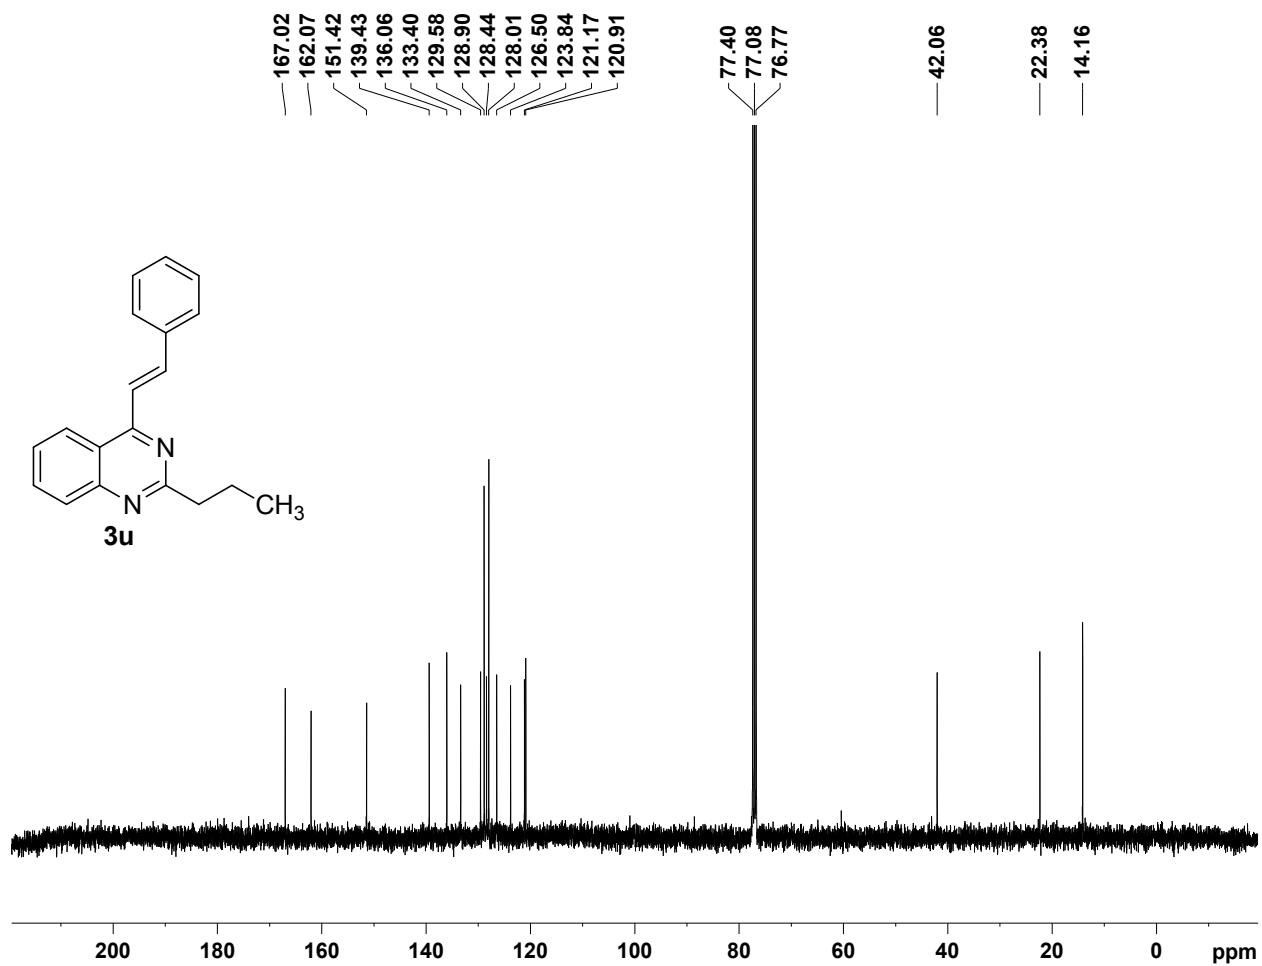

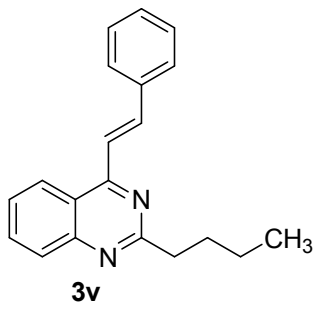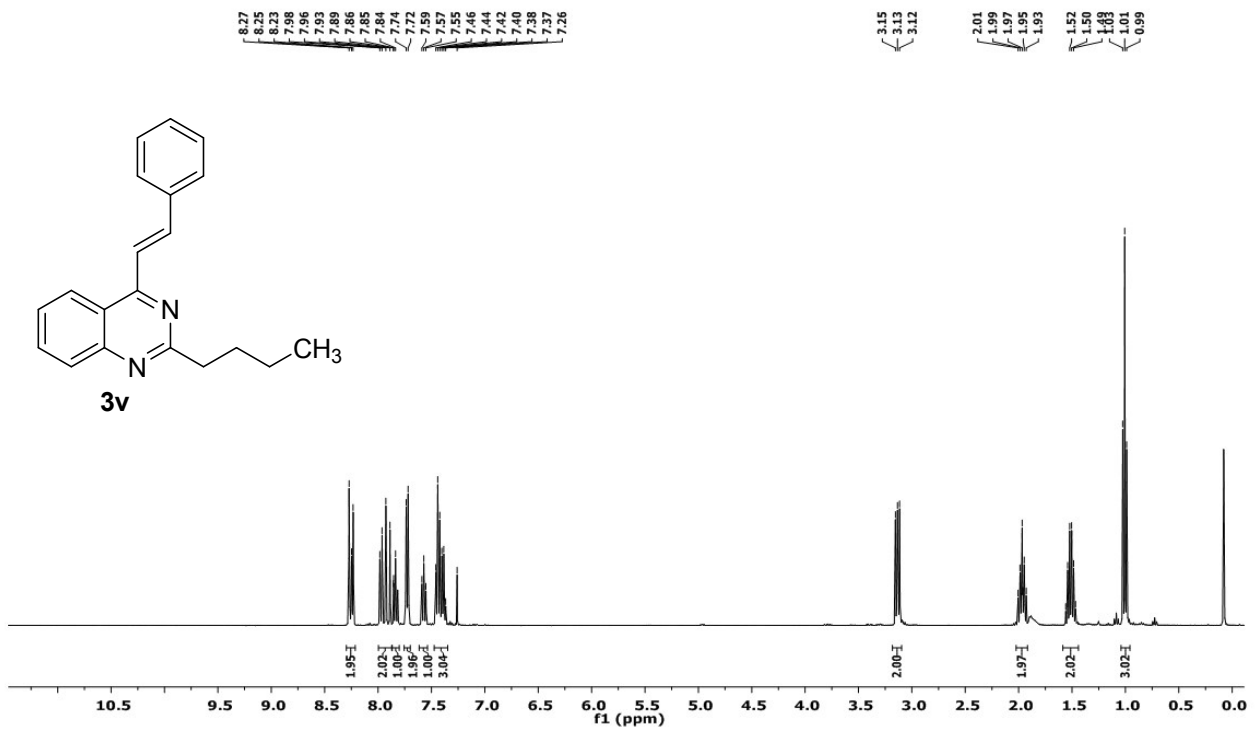

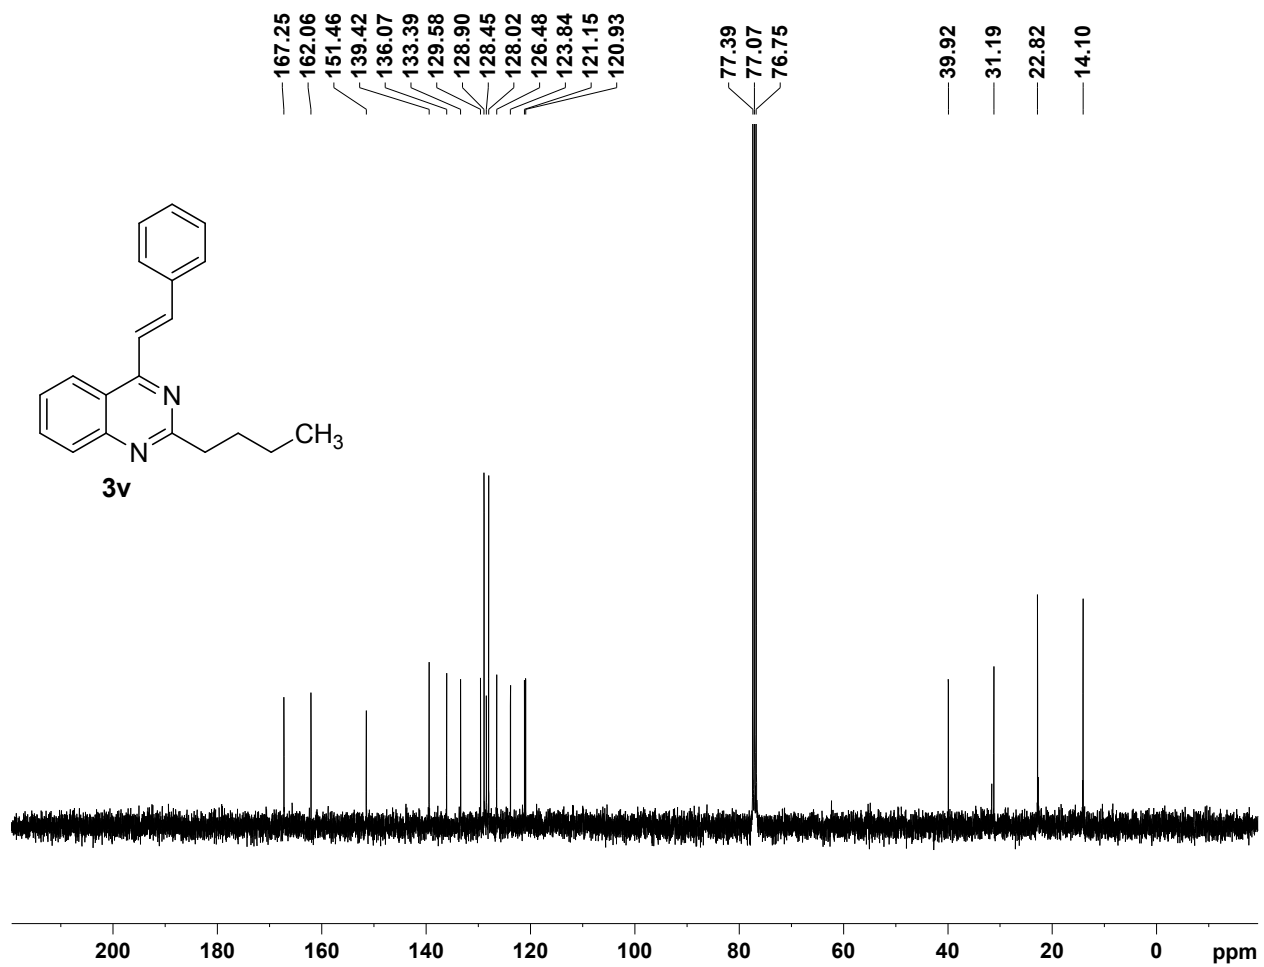

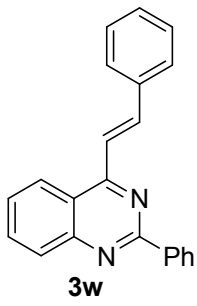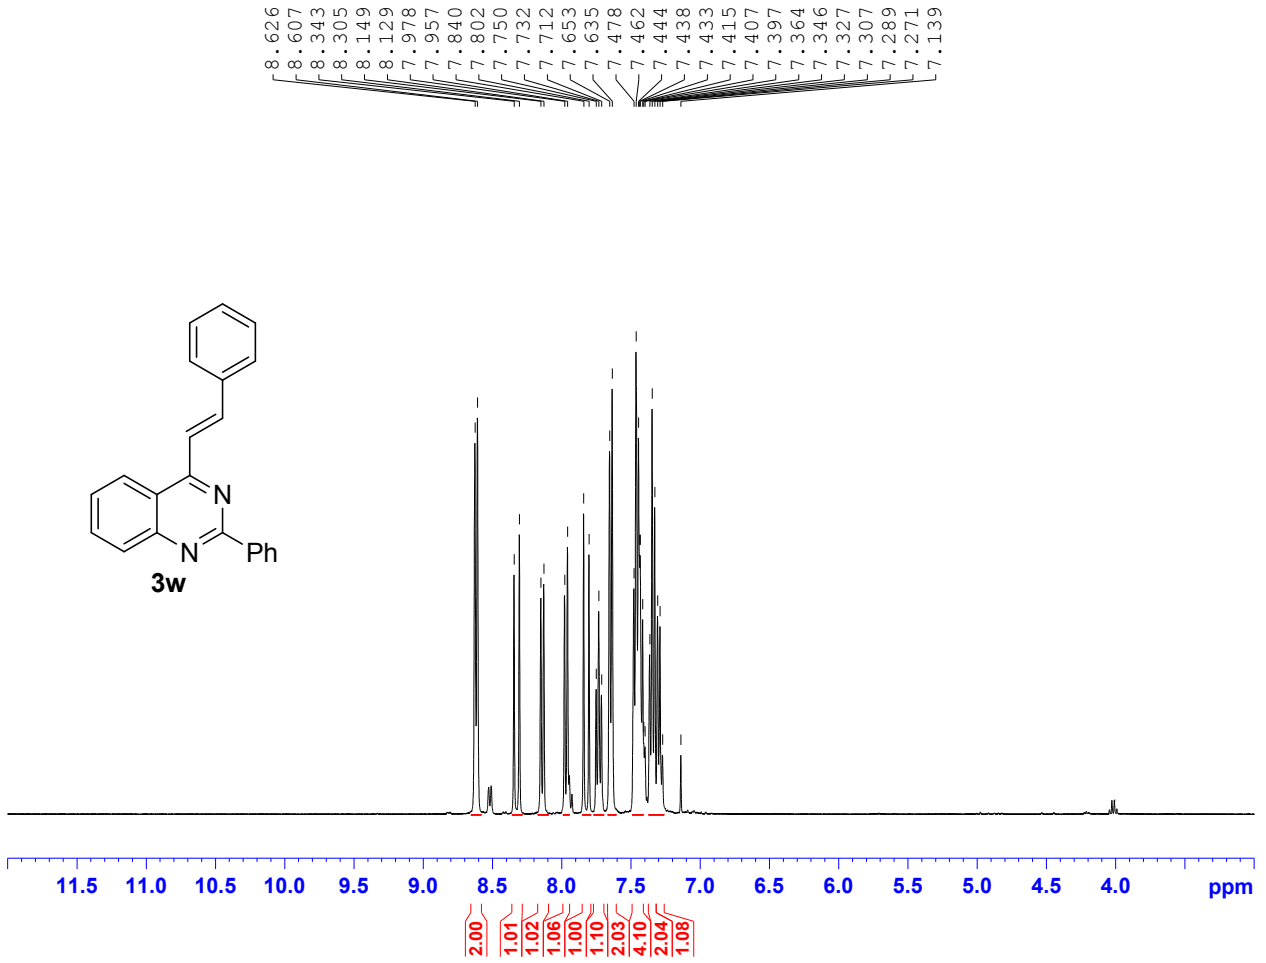

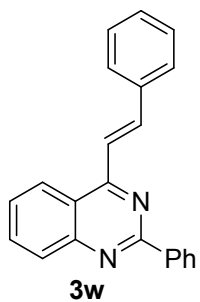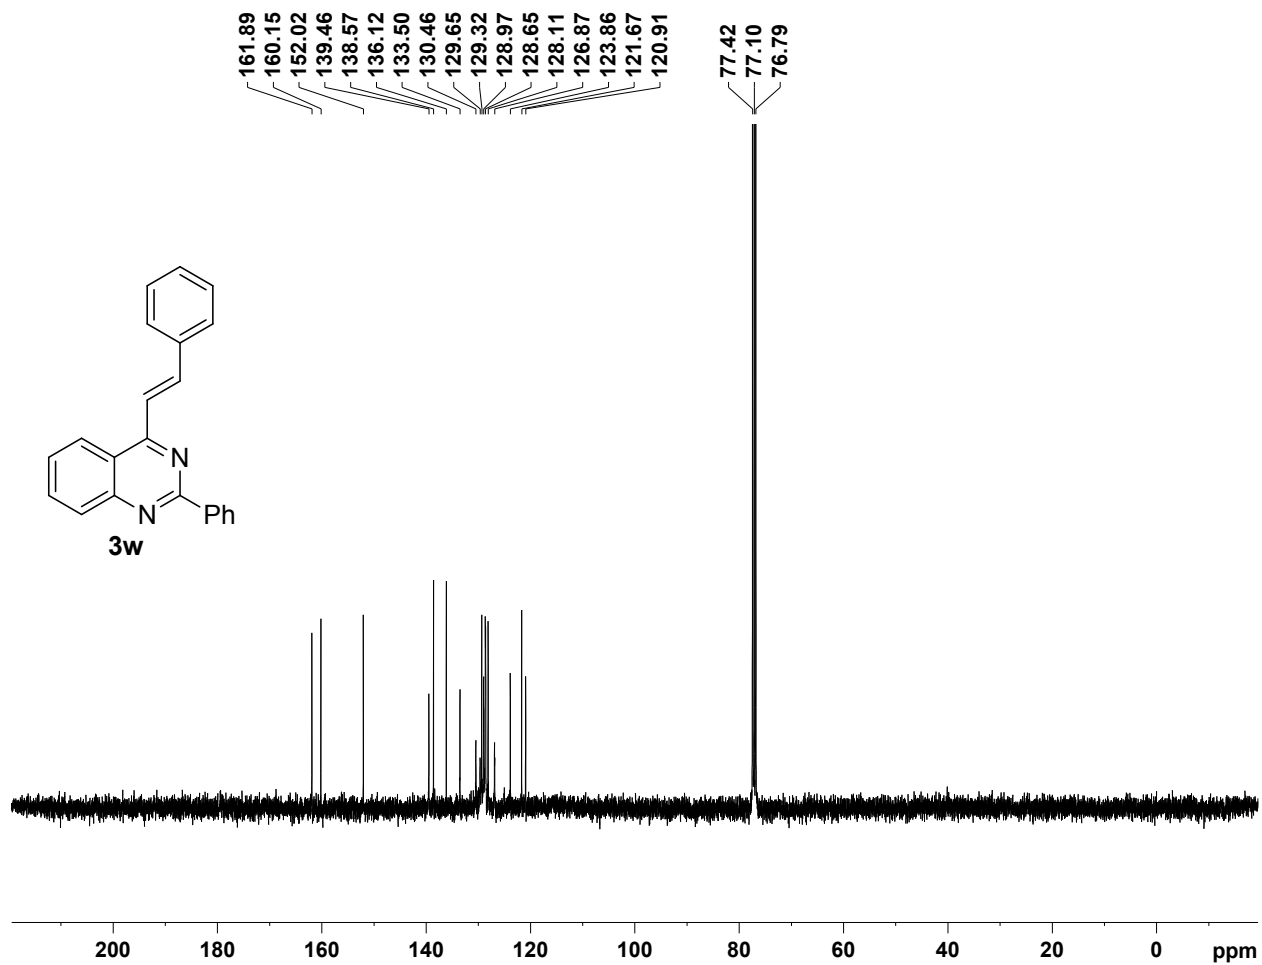

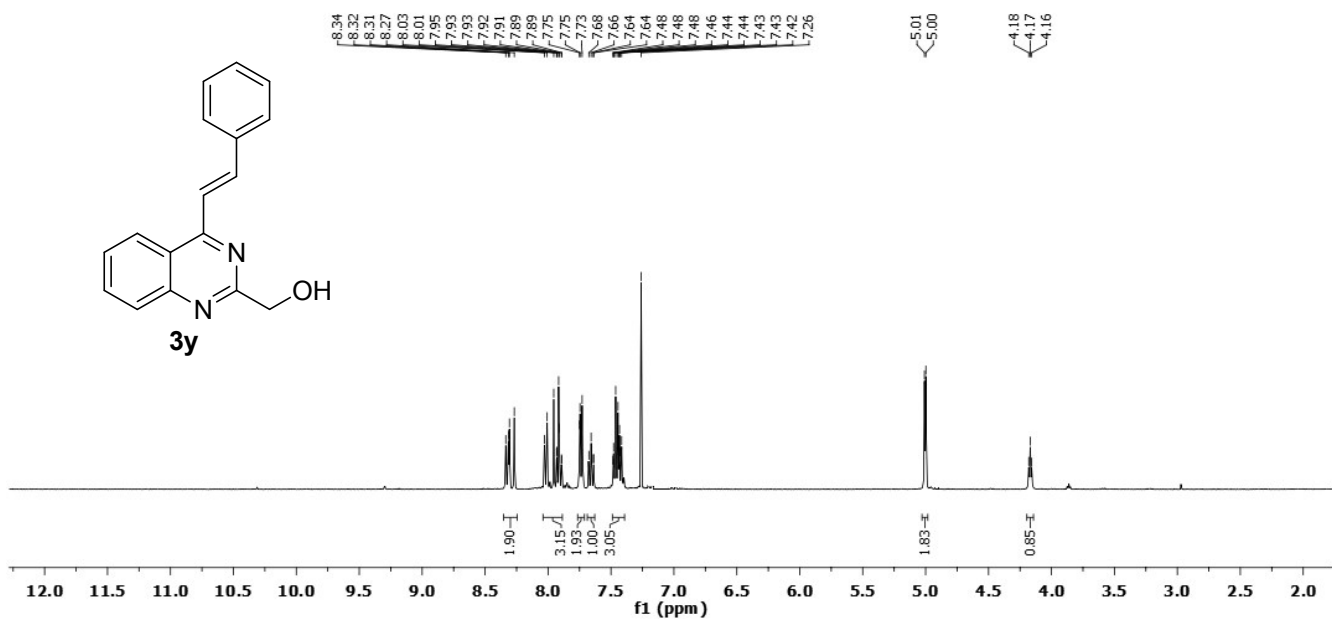



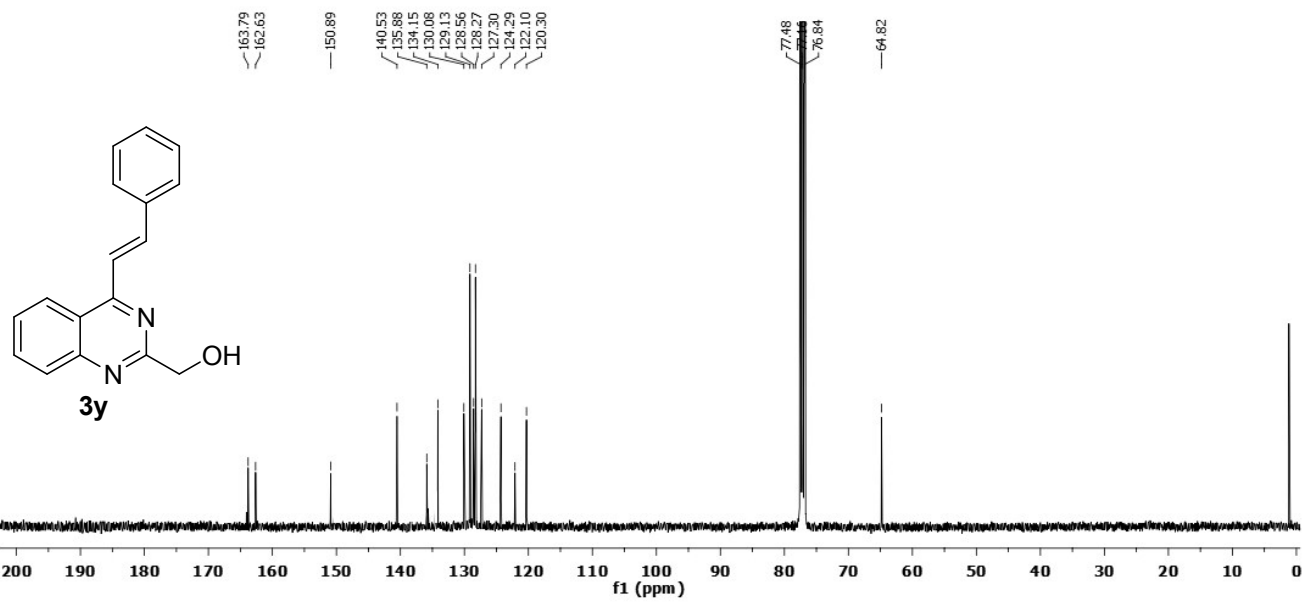

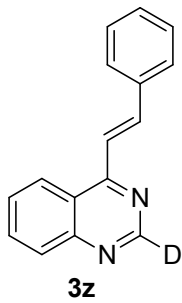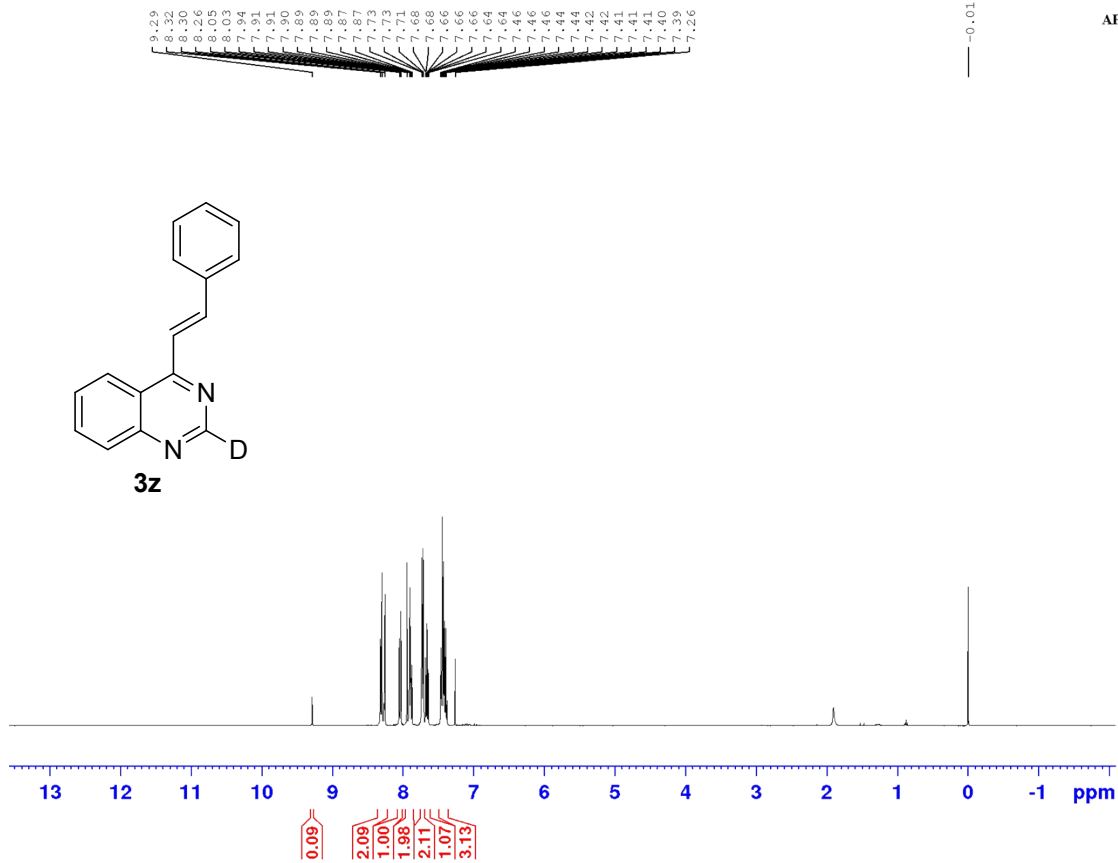

AP-Dec-TB-F-1H

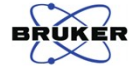

Current Data Parameters  
 NAME: NMR  
 EXPNO: 308  
 PROCNO: 1  
 F2 - Acquisition Parameters  
 Date\_: 20180628  
 Time: 12.28  
 INSTRUM: spect  
 PULPROG: zgpg30  
 TD: 32768  
 SOLVENT: CDCl3  
 NS: 4  
 DS: 4  
 SWH: 8812.000 Hz  
 FIDRES: 0.244332 Hz  
 AQ: 2.047123 sec  
 RG: 265.7  
 DW: 62.800 nsec  
 DE: 6.50 nsec  
 TE: 295.2 K  
 D1: 1.0000000 sec  
 CHANNEL f1  
 NUC1: 1H  
 P1: 14.00 nsec  
 PLW1: 0.0000000 W  
 STC1: 0.0131688 MHz  
 F2 - Processing parameters  
 SI: 3631  
 SF: 401.146000 MHz  
 WDW: EM  
 SSB: 0  
 LB: 0.30 Hz  
 GB: 0  
 PC: 1.00

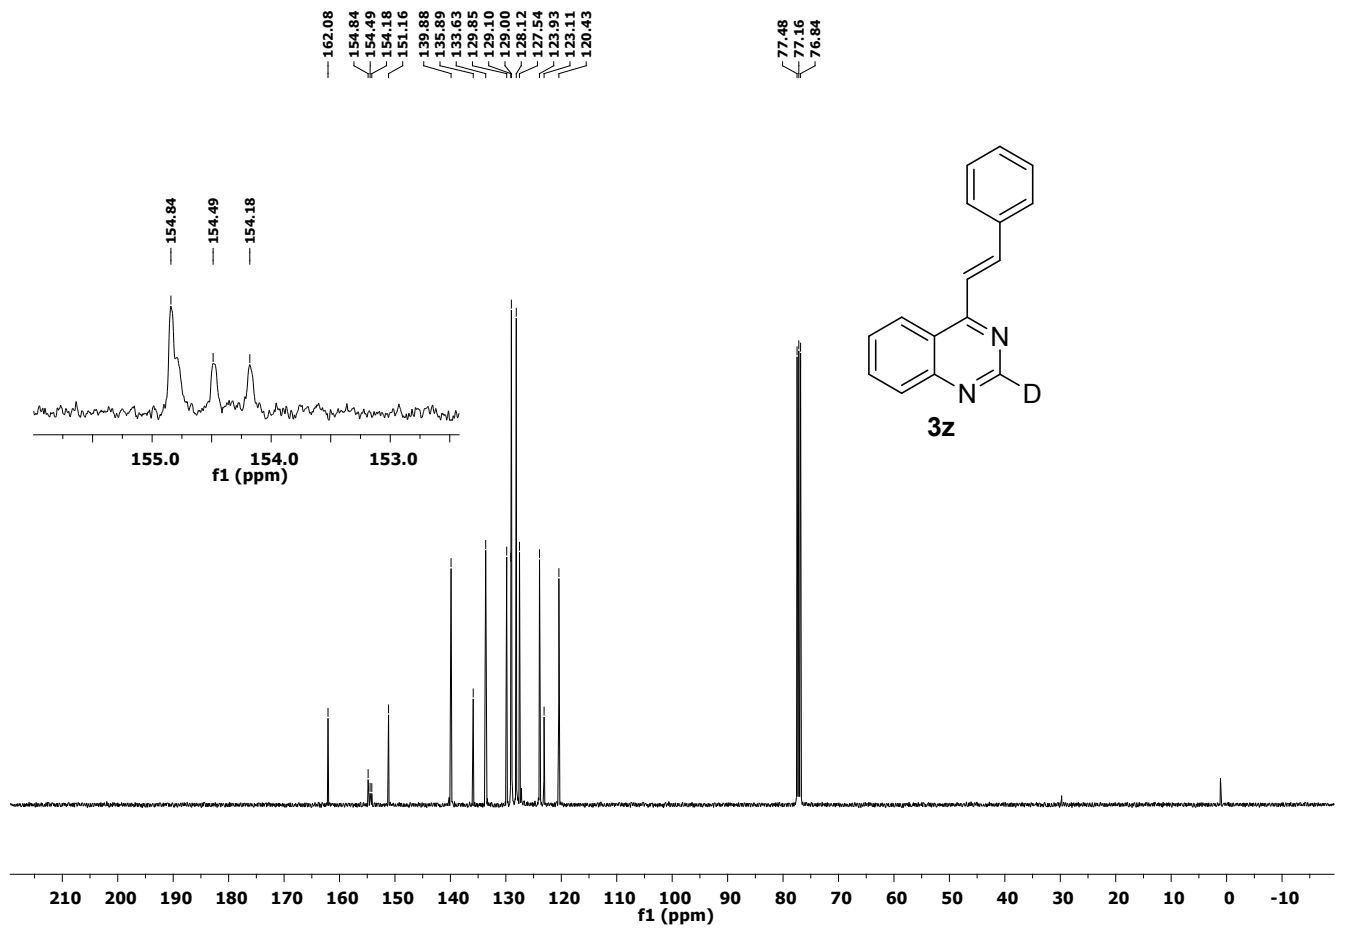

Supplement: c9ob00392d1.pdf [file c9ob00392d1.pdf]
